# Supplementary material for: Genetic architecture of quantitative traits in beef cattle revealed by genome wide association studies of imputed whole genome sequence variants: I: feed efficiency and component traits
Source: PubMed Central journal article supplement (PMC6956504; doi:10.1186/s12864-019-6362-1), 2020-01-13
Supplement: 12864_2019_6362_MOESM1_ESM.pdf [file 12864_2019_6362_MOESM1_ESM.pdf]

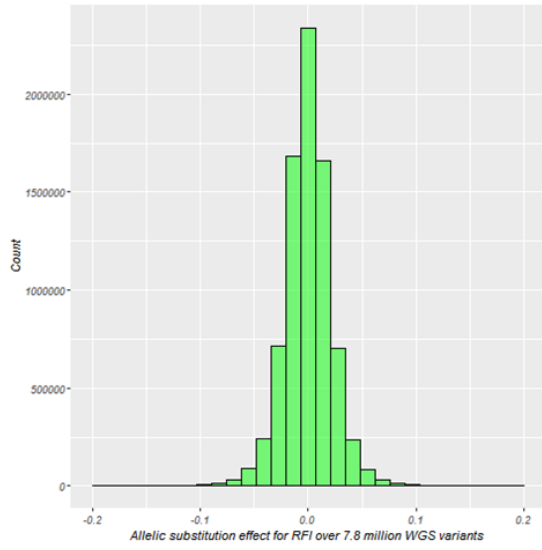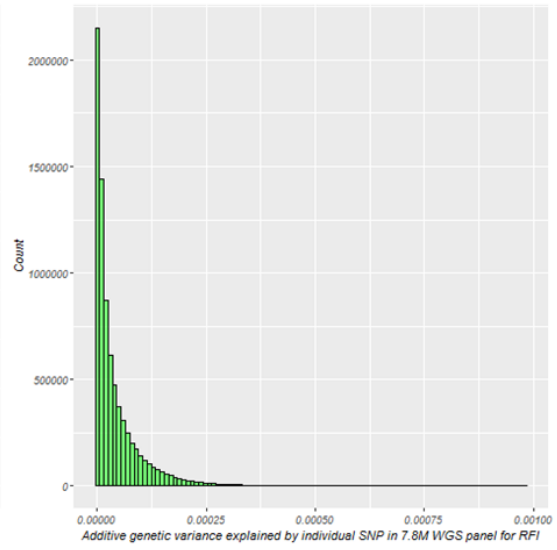

### RFI\_7.8M GWAS

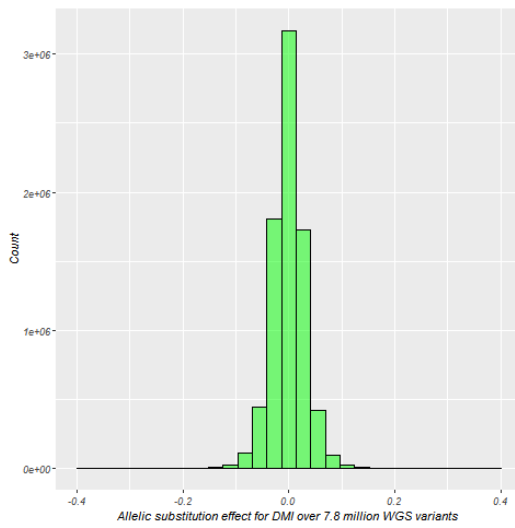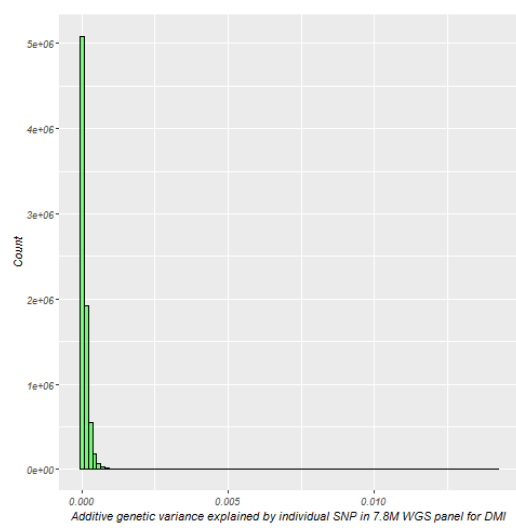

### DMI\_7.8M GWAS

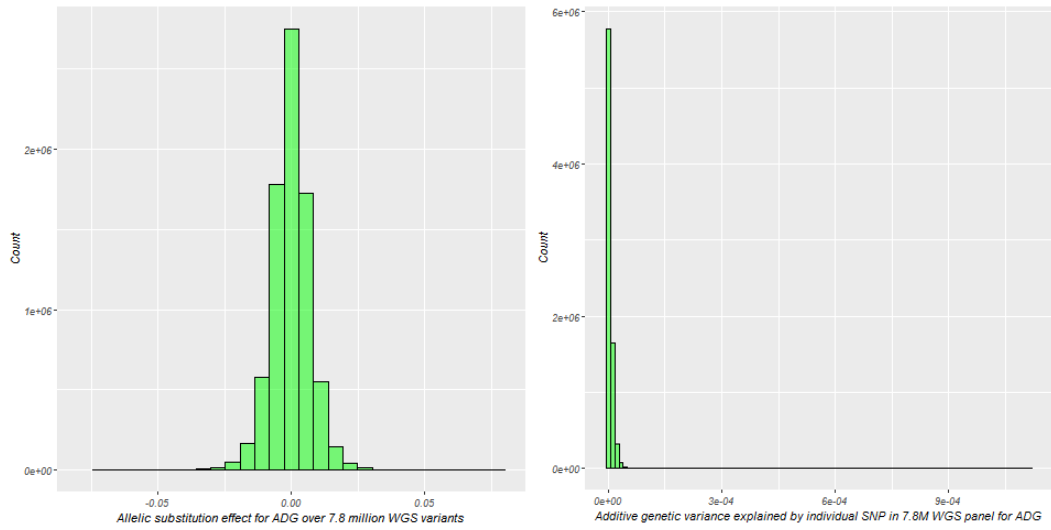

### ADG\_7.8M GWAS

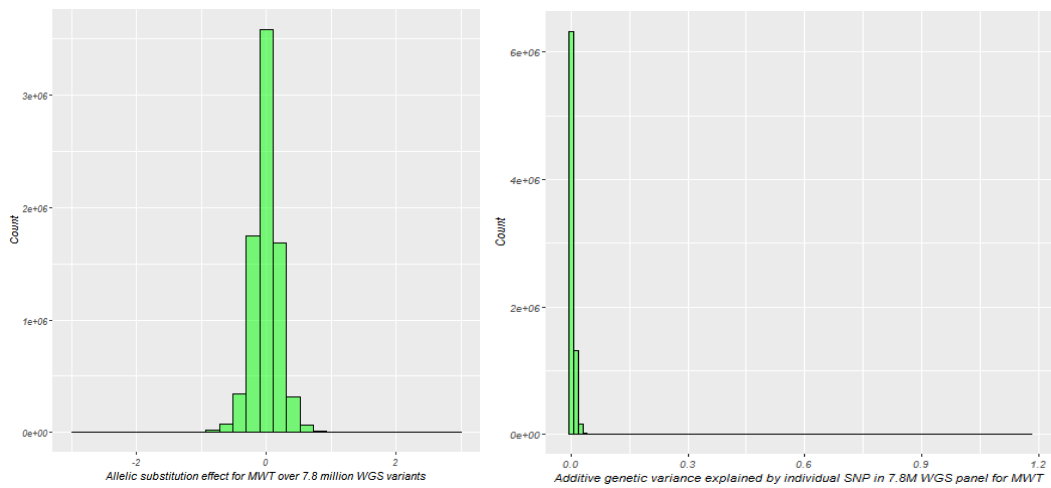

### MWT\_7.8M GWAS

**Figure S1.** Distribution of SNP allele substitution effects (left) and additive genetic variances explained by single SNPs (right) for RFI, DMI, ADG, and MWT based on 7.8 M whole genome sequence (WGS) variants.

Analysis: adjRFI\_new\_genes\_orths\_btoids\_withno\_othorlogs - 2019-03-24 06:56 PM

■ adjRFI\_new\_genes\_orths\_btoids\_withno\_othorlogs - 2019-03-24 06:56 PM

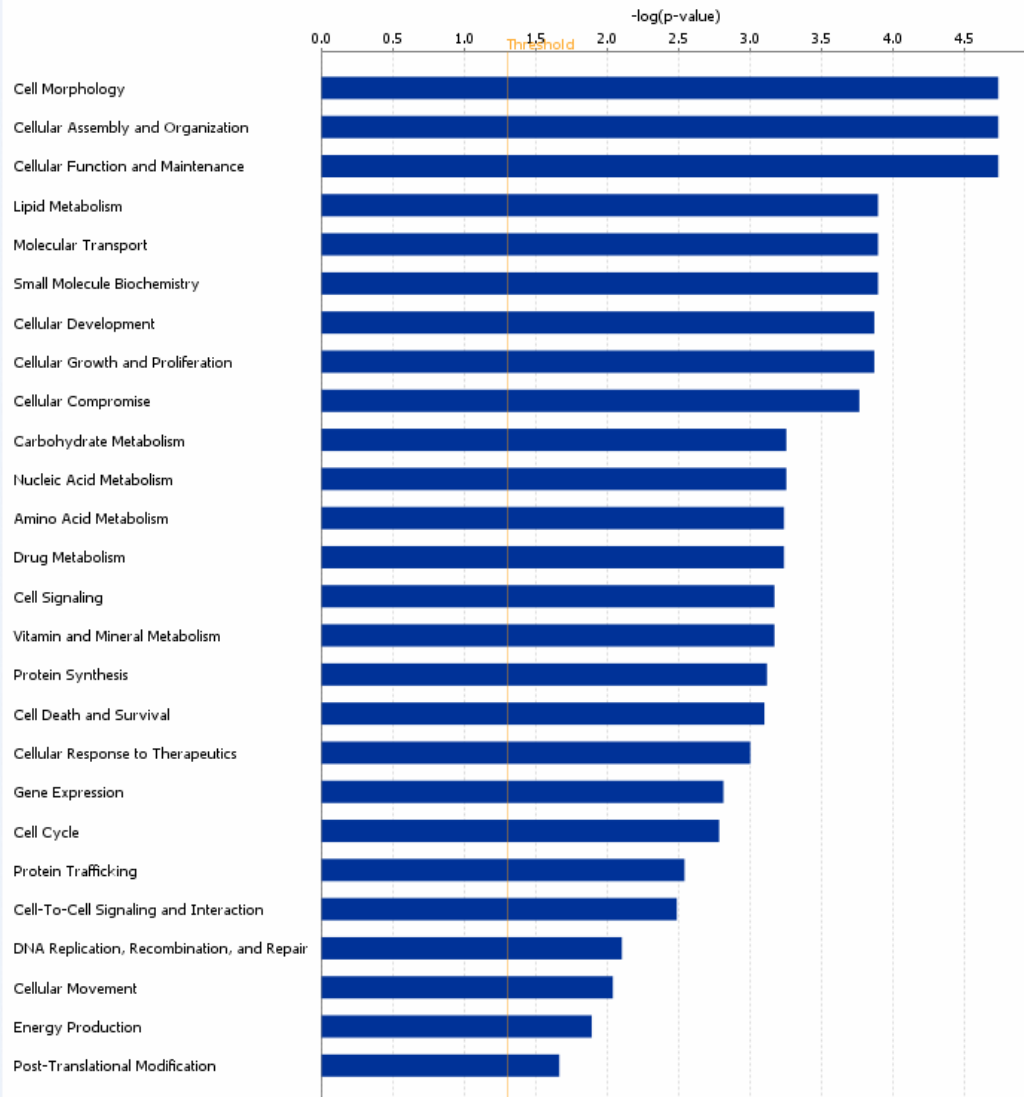

© 2000-2019 QIAGEN. All rights reserved.

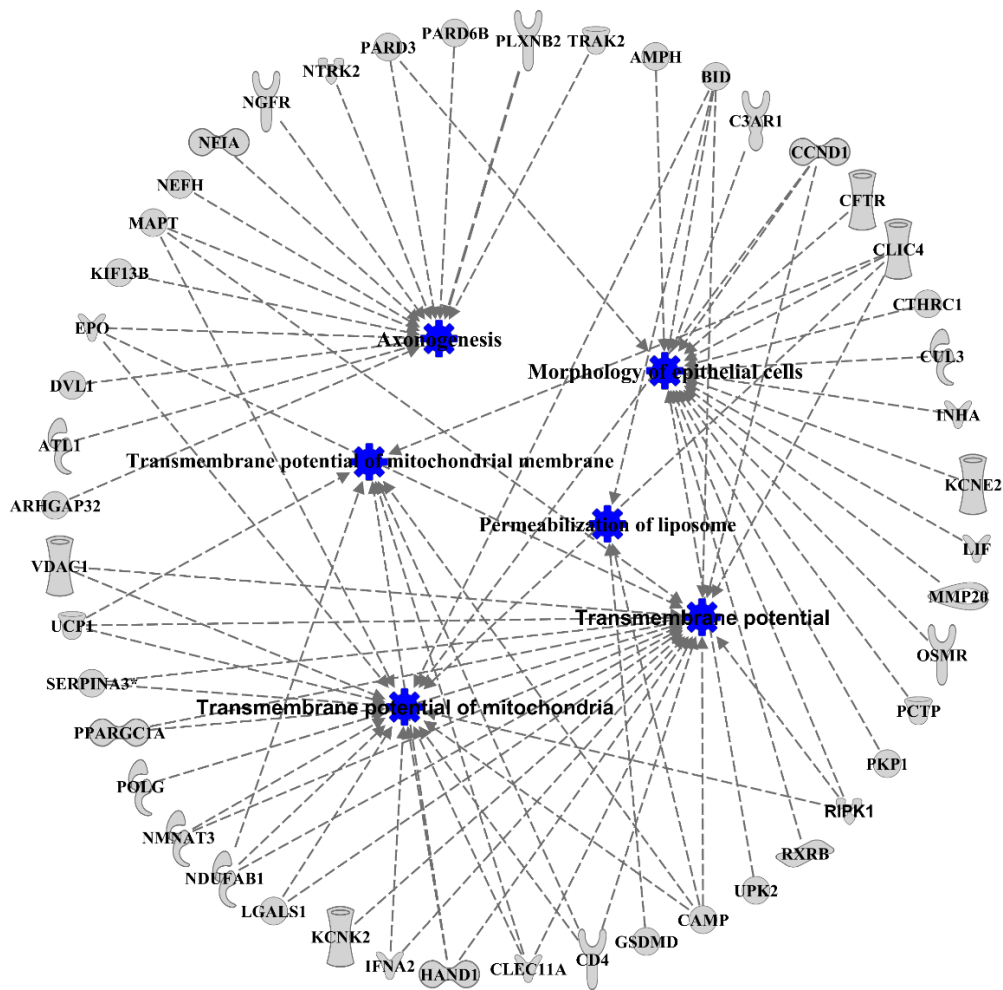

© 2000-2019 QIAGEN. All rights reserved.

**Figure S2.** The enriched cellular and molecular functions (top) and cell morphology network (bottom) for RFI. The images were generated through the use of Ingenuity Pathway Analysis (IPA) and written permission was granted by QIAGEN Silicon Valley to use and adapt the figure generated by IPA under the terms of the Creative Commons Attribution License (CC BY) 4.0.



Analysis: adjDMI\_new\_genes\_orths\_btoids\_withno\_othorlogs - 2019-03-24 07:41 PM

■ adjDMI\_new\_genes\_orths\_btoids\_withno\_othorlogs - 2019-03-24 07:41 PM

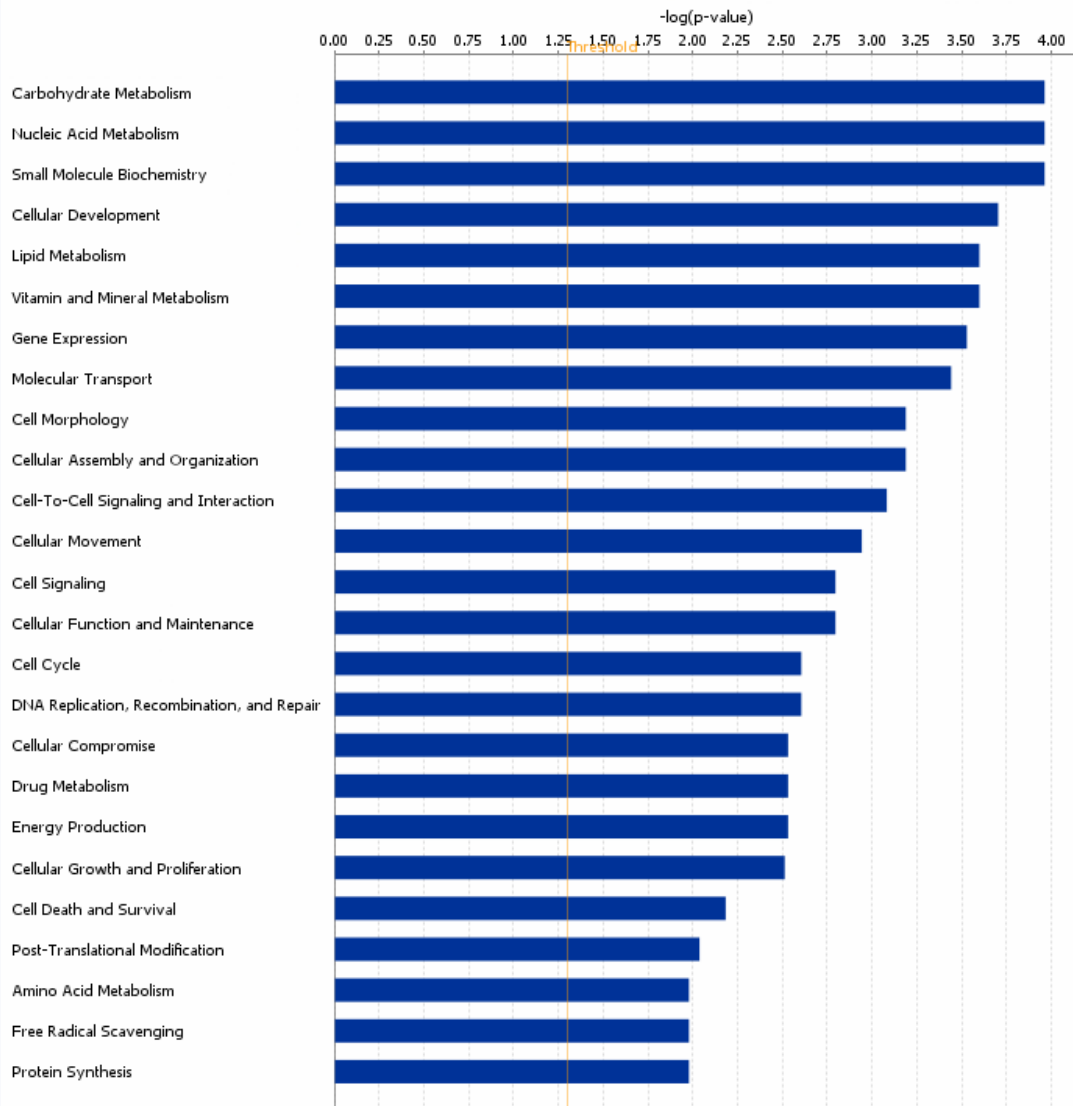

© 2000-2019 QIAGEN. All rights reserved.

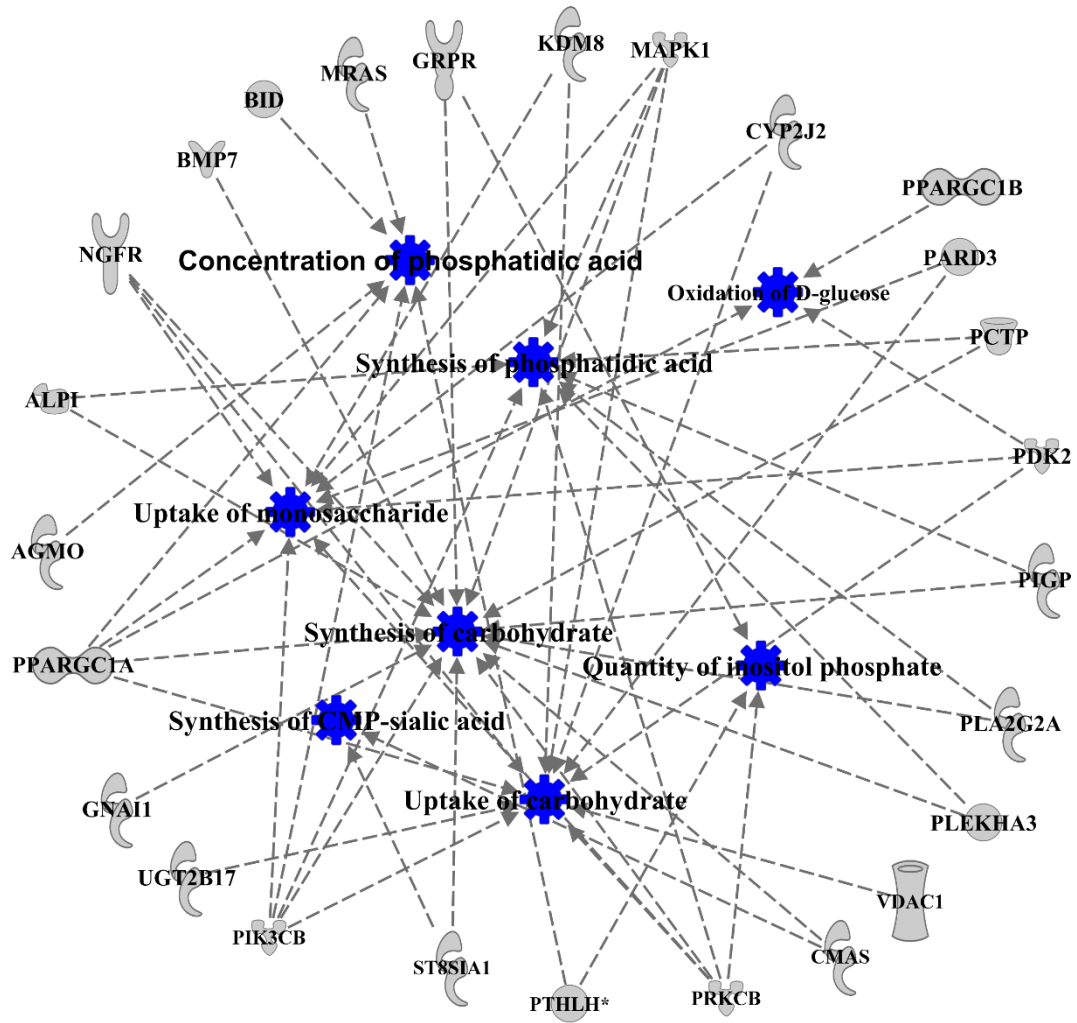

**Figure S3.** The enriched cellular and molecular functions (top) and carbohydrate metabolism network (bottom) for DMI. The images were generated through the use of Ingenuity Pathway Analysis (IPA) and written permission was granted by QIAGEN Silicon Valley to use and adapt the figure generated by IPA under the terms of the Creative Commons Attribution License (CC BY) 4.0.

Analysis: adjADG\_new\_genes\_orths\_btoids\_withno\_orthologs - 2019-03-24 07:35 PM

■ adjADG\_new\_genes\_orths\_btoids\_withno\_orthologs - 2019-03-24 07:35 PM

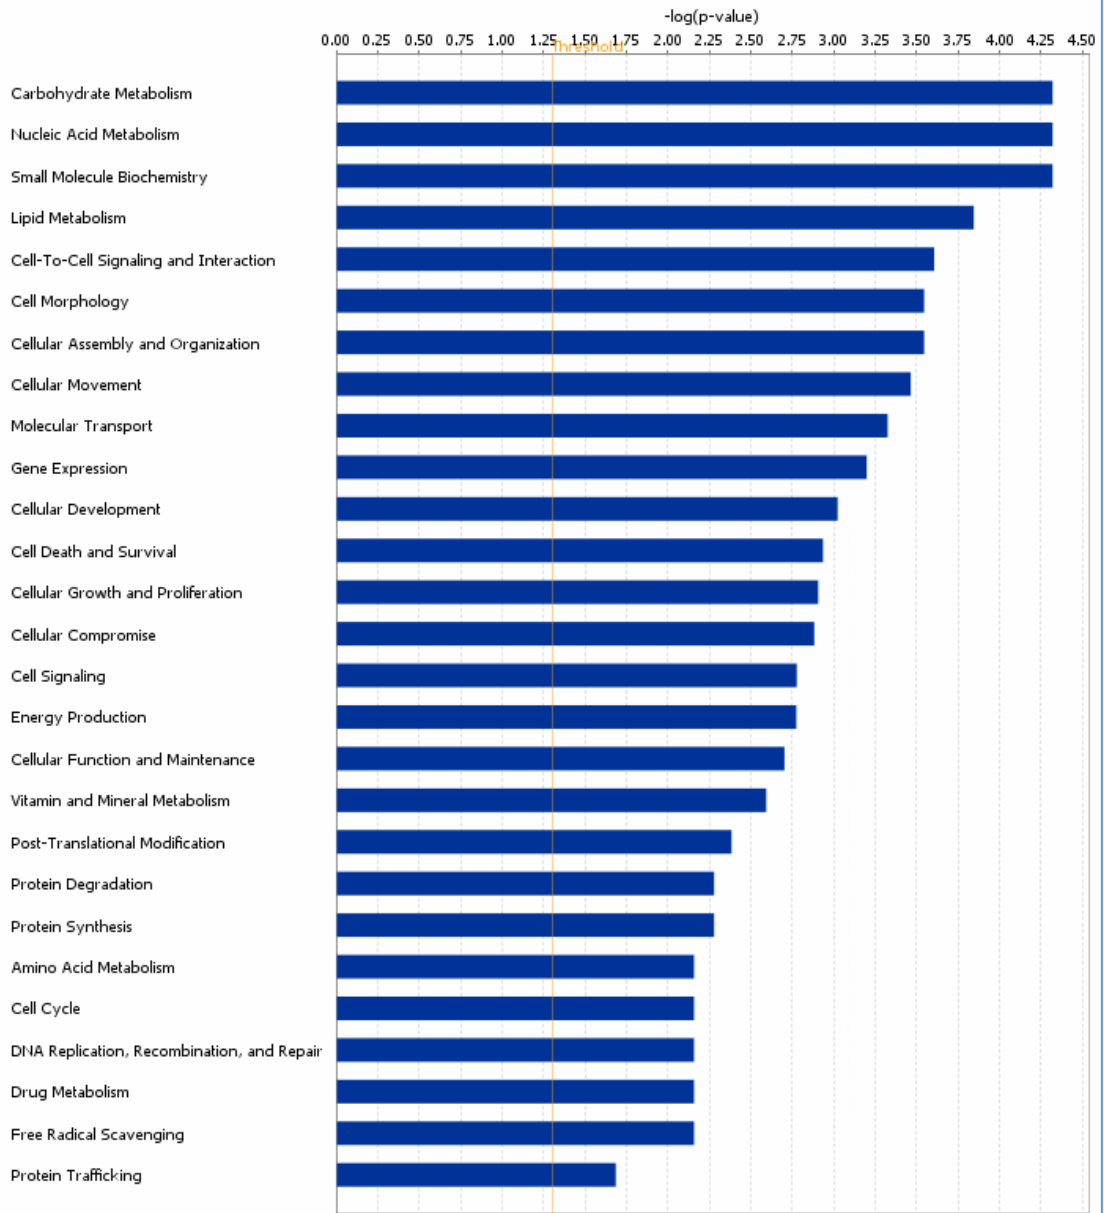

© 2000-2019 QIAGEN. All rights reserved.



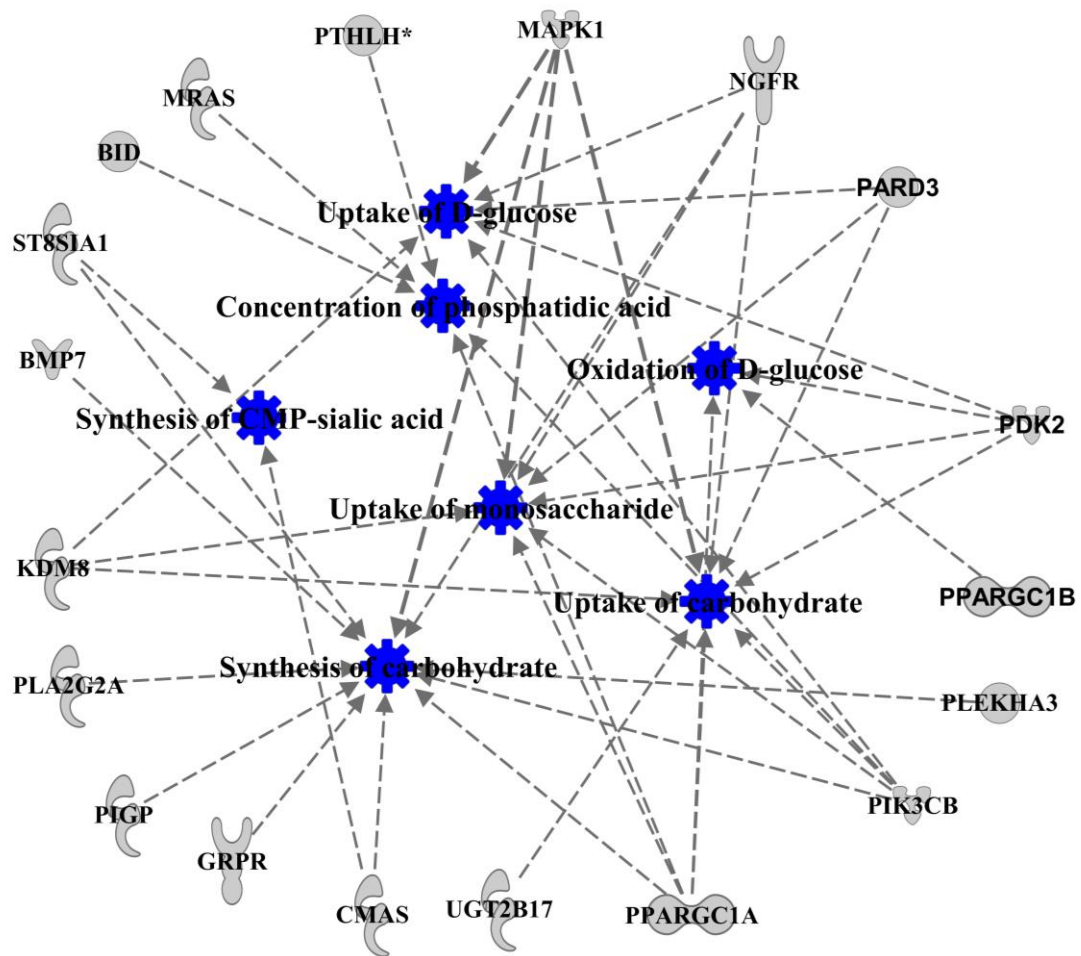

**Figure S4.** The enriched cellular and molecular functions (top) and carbohydrate metabolism network (bottom) for ADG. The images were generated through the use of Ingenuity Pathway Analysis (IPA) and written permission was granted by QIAGEN Silicon Valley to use and adapt the figure generated by IPA under the terms of the Creative Commons Attribution License (CC BY) 4.0.

Analysis: adjMWT\_new\_genes\_orths\_btaiids\_withno\_othorlogs - 2019-03-24 07:49 PM

■ adjMWT\_new\_genes\_orths\_btaiids\_withno\_othorlogs - 2019-03-24 07:49 PM

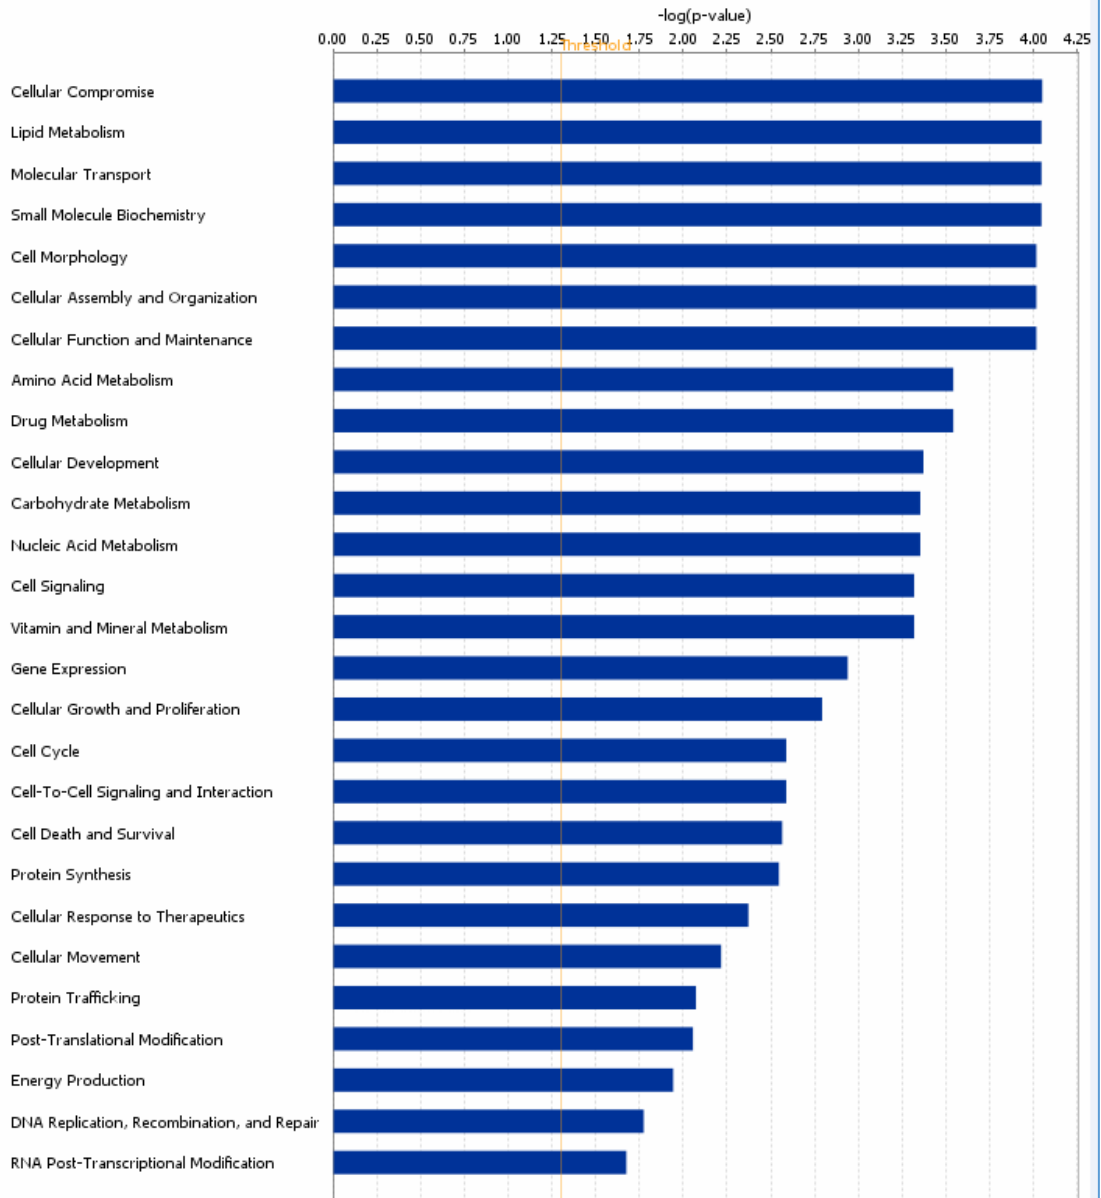

© 2000-2019 QIAGEN. All rights reserved.

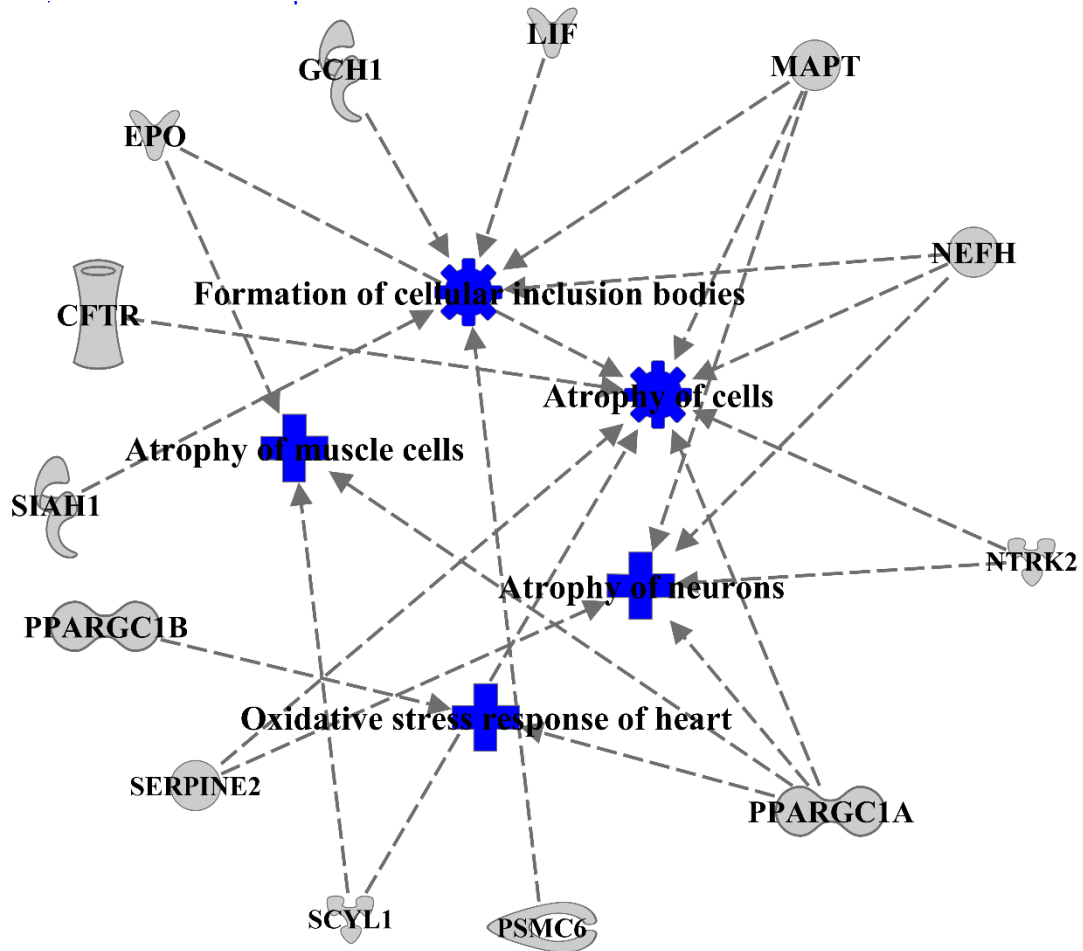

**Figure S5.** The enriched cellular and molecular functions (top) and cellular compromise network (bottom) for MWT. The images were generated through the use of Ingenuity Pathway Analysis (IPA) and written permission was granted by QIAGEN Silicon Valley to use and adapt the figure generated by IPA under the terms of the Creative Commons Attribution License (CC BY) 4.0.

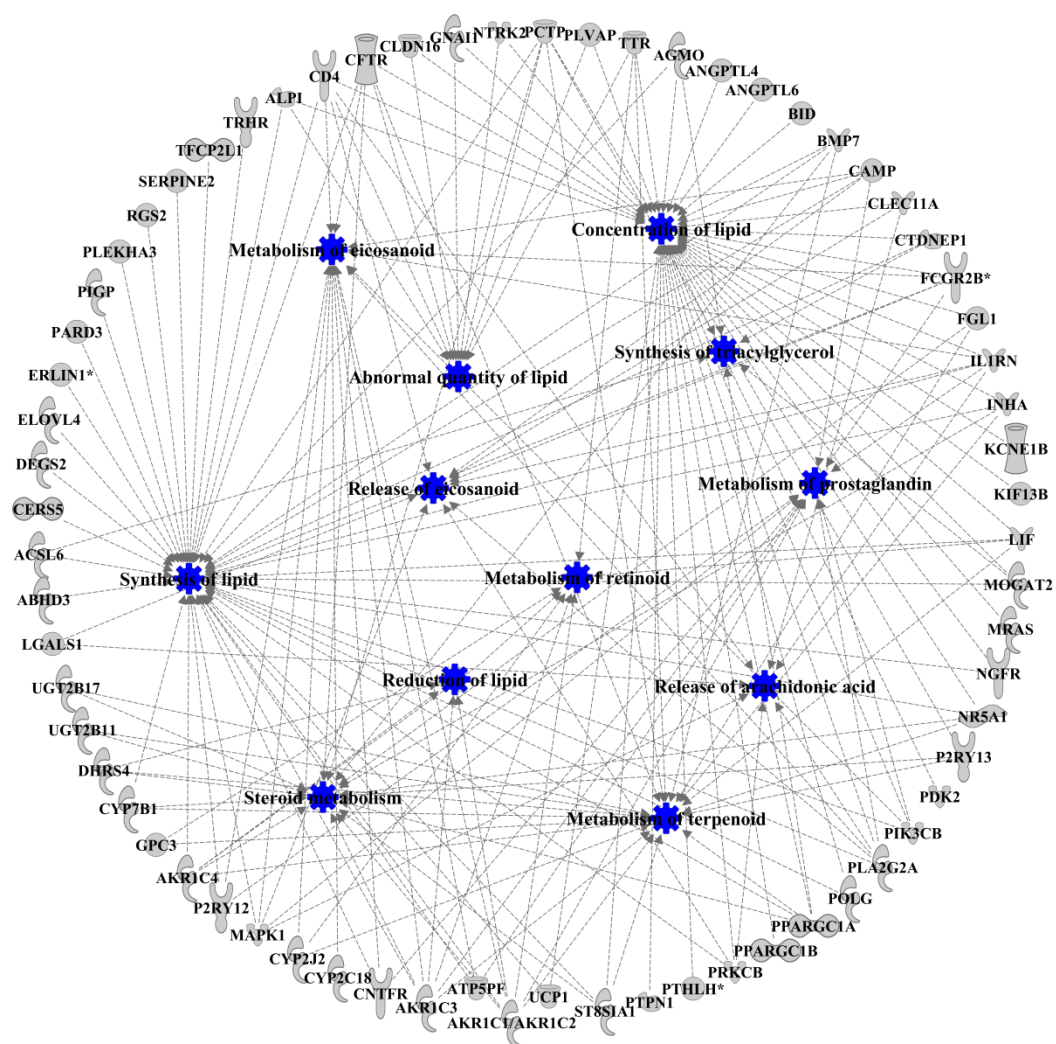

RFI

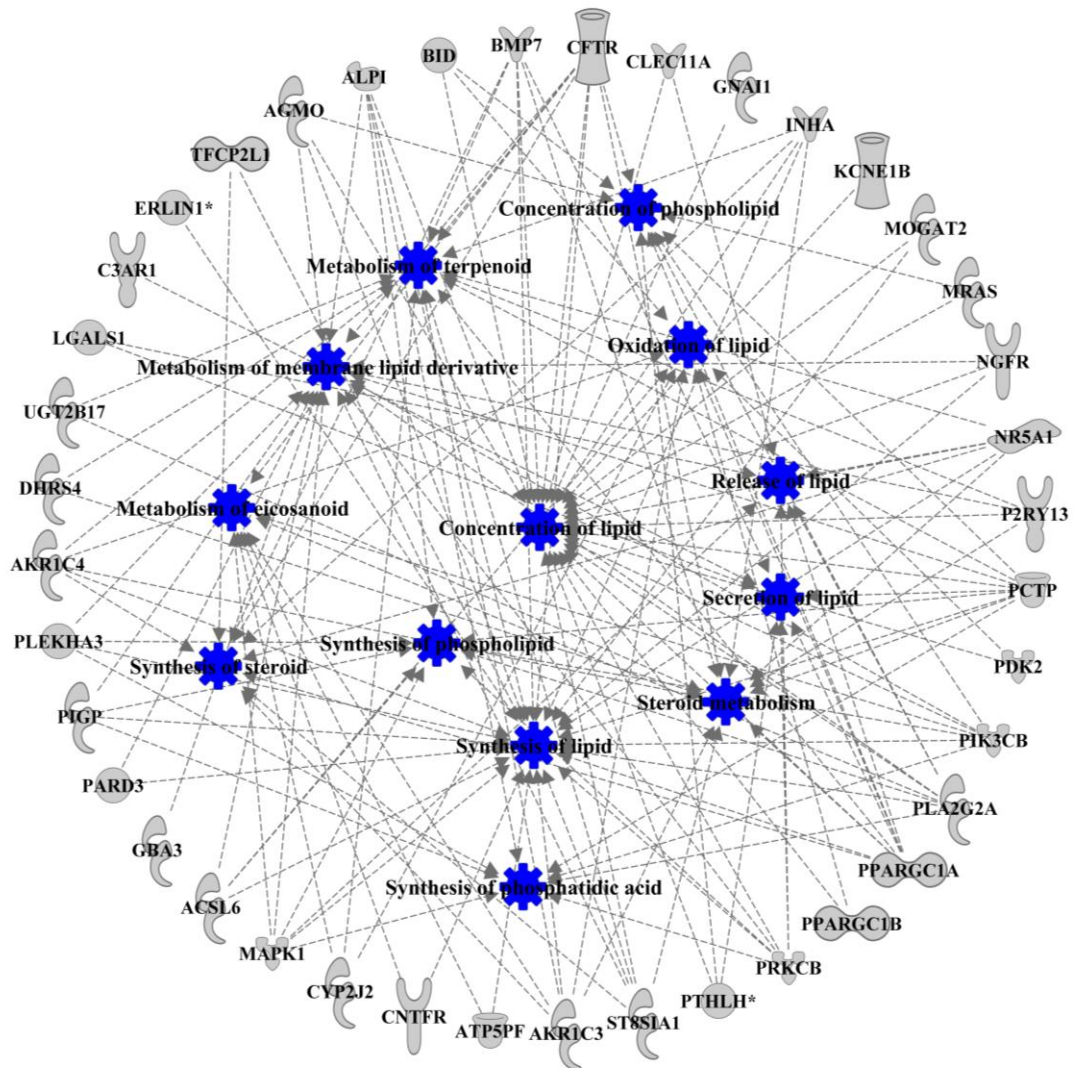

DMI

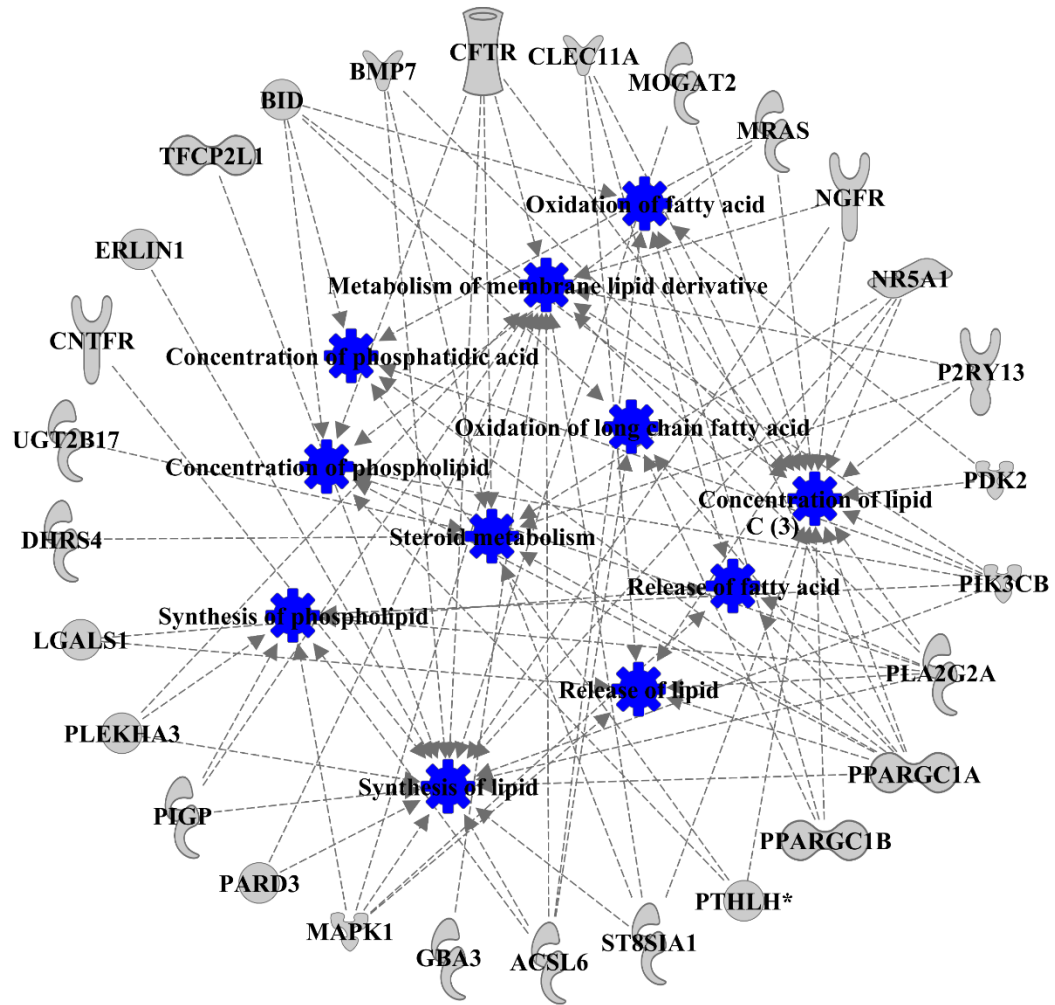

ADG

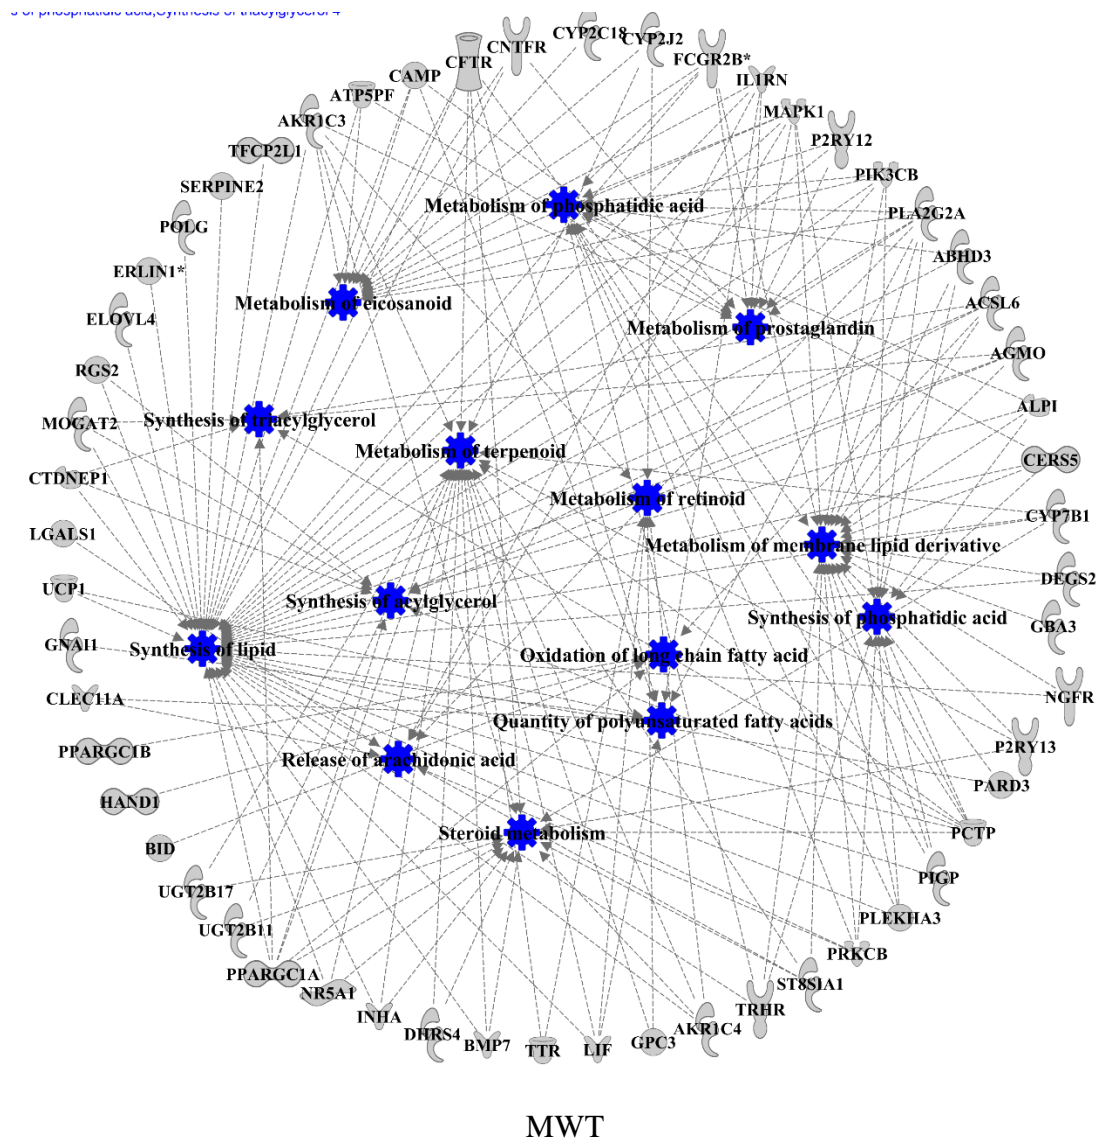

**Figure S6.** Lipid metabolism network for RFI and its component traits DMI, ADG, and MWT. The images were generated through the use of Ingenuity Pathway Analysis (IPA) and written permission was granted by QIAGEN Silicon Valley to use and adapt the figure generated by IPA under the terms of the Creative Commons Attribution License (CC BY) 4.0.

a

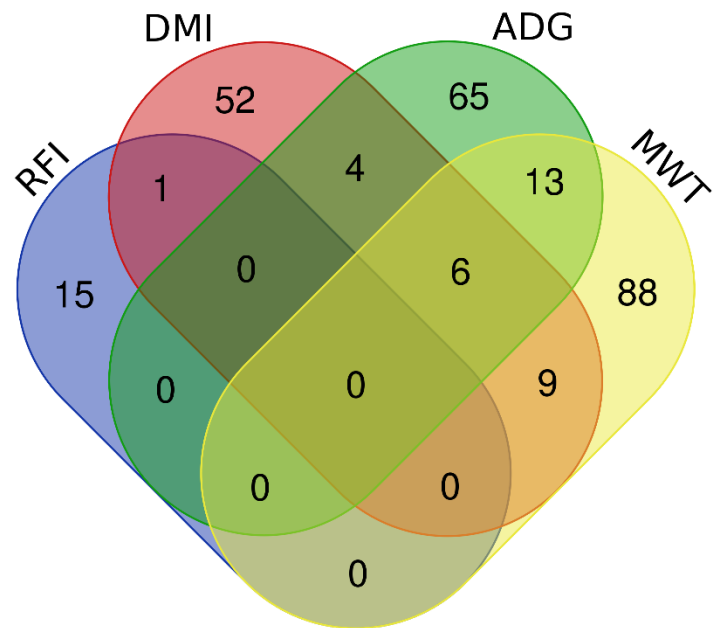

b

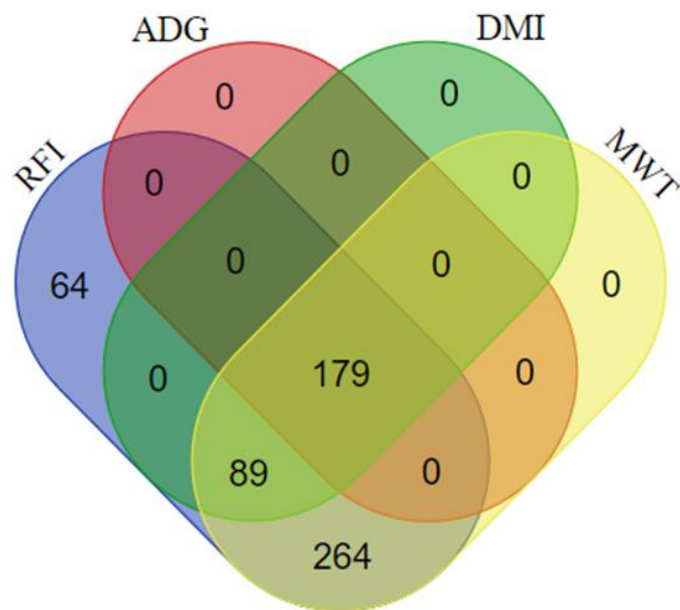

**Figure S7.** Common lead significant SNPs with the same IDs (a) and candidate genes (b) among RFI and its three component traits at thresholds P-value < 1.00E-05 and FDR < 0.10 based on the imputed 7.8M DNA variant GWAS.



a

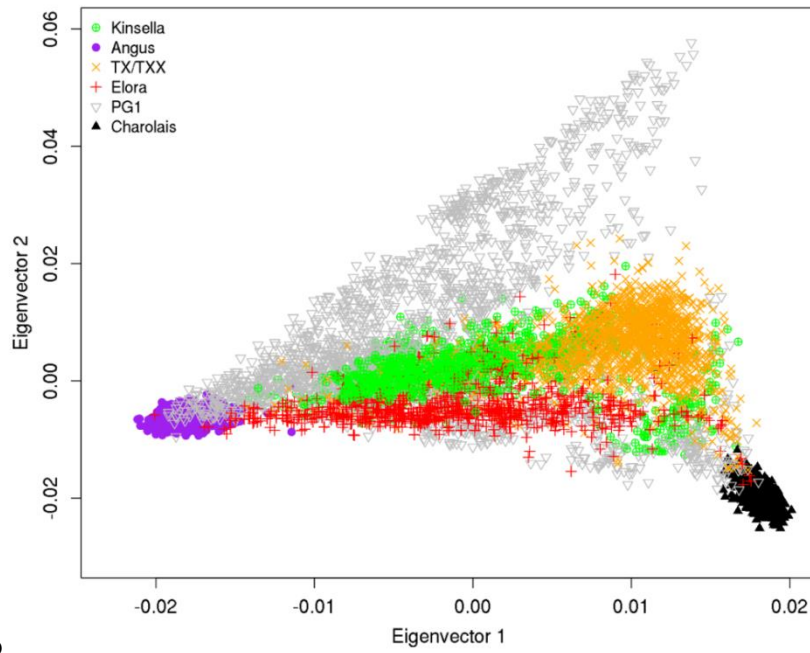

b

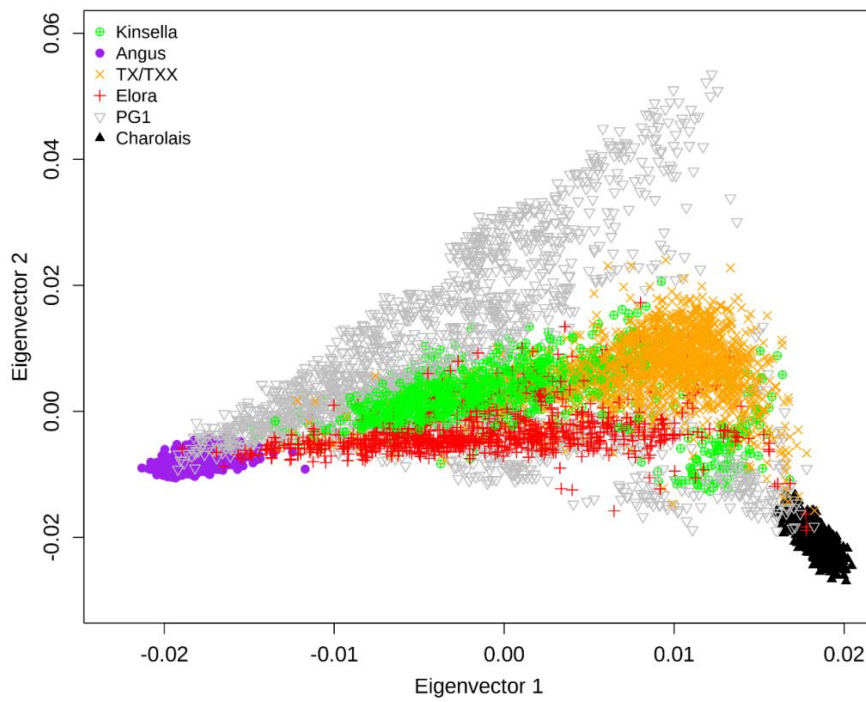

**Figure S8.** Principal component analyses of Canadian beef cattle populations (N=7573) based on the 50K SNP (a) and 7.8M GWS variant (b) panels.
