# Supplementary material for: Genetic architecture of quantitative traits in beef cattle revealed by genome wide association studies of imputed whole genome sequence variants: I: feed efficiency and component traits
Source: PubMed Central journal article supplement (PMC6956504; doi:10.1186/s12864-019-6362-1), 2020-01-13
Supplement: 12864_2019_6362_MOESM3_ESM.pdf [file 12864_2019_6362_MOESM3_ESM.pdf]

**Table S1.** Accuracy of genotype imputation from Illumina 50K SNPs to whole genome sequence (WGS) variant genotypes via HD using Fimpute 2.2

|              | Number of total WGS variant genotypes of 240 animals | Number of correctly imputed WGS variant genotypes of 240 animals | Imputation accuracy | Number of imputed WGS variant genotypes per animal |
|--------------|------------------------------------------------------|------------------------------------------------------------------|---------------------|----------------------------------------------------|
| BTA1         | 579745680                                            | 562381176                                                        | 0.97                | 2415607                                            |
| BTA2         | 494930160                                            | 480738782                                                        | 0.9713              | 2062209                                            |
| BTA3         | 419358240                                            | 405858001                                                        | 0.9678              | 1747326                                            |
| BTA4         | 441735600                                            | 427070290                                                        | 0.9668              | 1840565                                            |
| BTA5         | 429833520                                            | 413270103                                                        | 0.9615              | 1790973                                            |
| BTA6         | 425628240                                            | 412122198                                                        | 0.9683              | 1773451                                            |
| BTA7         | 386629200                                            | 373029804                                                        | 0.9648              | 1610955                                            |
| BTA8         | 389297760                                            | 377097399                                                        | 0.9687              | 1622074                                            |
| BTA9         | 373340160                                            | 361456820                                                        | 0.9682              | 1555584                                            |
| BTA10        | 367824960                                            | 353656505                                                        | 0.9615              | 1532604                                            |
| BTA11        | 371232240                                            | 359010340                                                        | 0.9671              | 1546801                                            |
| BTA12        | 400109760                                            | 372585988                                                        | 0.9312              | 1667124                                            |
| BTA13        | 296662080                                            | 287426524                                                        | 0.9689              | 1236092                                            |
| BTA14        | 296392560                                            | 286832216                                                        | 0.9677              | 1234969                                            |
| BTA15        | 339638400                                            | 326968651                                                        | 0.9627              | 1415160                                            |
| BTA16        | 309841200                                            | 298947370                                                        | 0.9648              | 1291005                                            |
| BTA17        | 277840560                                            | 265963664                                                        | 0.9573              | 1157669                                            |
| BTA18        | 231474480                                            | 221864425                                                        | 0.9585              | 964477                                             |
| BTA19        | 223123920                                            | 213964332                                                        | 0.9589              | 929683                                             |
| BTA20        | 269202000                                            | 261302594                                                        | 0.9707              | 1121675                                            |
| BTA21        | 261251520                                            | 251574275                                                        | 0.963               | 1088548                                            |
| BTA22        | 214242720                                            | 207343689                                                        | 0.9678              | 892678                                             |
| BTA23        | 243928080                                            | 233011283                                                        | 0.9552              | 1016367                                            |
| BTA24        | 238661280                                            | 231785947                                                        | 0.9712              | 994422                                             |
| BTA25        | 160847520                                            | 155123815                                                        | 0.9644              | 670198                                             |
| BTA26        | 187047.12                                            | 180321128                                                        | 0.964               | 779363                                             |
| BTA27        | 167550240                                            | 161171728                                                        | 0.9619              | 698126                                             |
| BTA28        | 185485440                                            | 179423584                                                        | 0.9673              | 772856                                             |
| BTA29        | 213699120                                            | 205252771                                                        | 0.9605              | 890413                                             |
| Whole-genome | 9,196,553,760                                        | 8,866,555,402                                                    | 0.9641              | 38,318,974                                         |

**Table S2.** Functional annotations of 7.8M WGS variants along with the number of variants in each class, classification of SNP functions, percentage of WGS and 9 functional class assignments

| Functional class annotation                                                  | Number of SNPs | Classification of SNP functions | Proportion* |
|------------------------------------------------------------------------------|----------------|---------------------------------|-------------|
| intergenic_region                                                            | 5251680        | intergenic_region               | 66.87%      |
| downstream_gene_variant                                                      | 253163         | downstream_gene_variant         | 3.22%       |
| upstream_gene_variant                                                        | 285798         | upstream_gene_variant           | 3.64%       |
| non_coding_exon_variant                                                      | 1953           | synonymous_variant              | 0.41%       |
| synonymous_variant                                                           | 30066          | synonymous_variant              |             |
| intron_variant                                                               | 1987366        | intron_variant                  | 25.31%      |
| missense_variant                                                             | 17654          | missense_variant                | 0.22%       |
| 3'UTR_variant                                                                | 15851          | 3'UTR_variant                   | 0.20%       |
| 5'UTR_variant                                                                | 2868           | 5'UTR_variant                   | 0.04%       |
| 5'UTR_premature_start_codon_gain_variant                                     | 441            | 5'UTR_variant                   |             |
| splice_region_variant&intron_variant                                         | 4189           | Other_regulatory                |             |
| missense_variant&splice_region_variant                                       | 470            | Other_regulatory                |             |
| splice_region_variant&synonymous_variant                                     | 664            | Other_regulatory                |             |
| inframe_deletion                                                             | 98             | Other_regulatory                |             |
| frameshift_variant                                                           | 150            | Other_regulatory                |             |
| splice_donor_variant&intron_variant                                          | 118            | Other_regulatory                |             |
| disruptive_inframe_deletion                                                  | 52             | Other_regulatory                | 0.08%       |
| splice_region_variant                                                        | 141            | Other_regulatory                |             |
| splice_acceptor_variant&intron_variant                                       | 116            | Other_regulatory                |             |
| frameshift_variant&splice_donor_variant&splice_region_variant&intron_variant | 3              | Other_regulatory                |             |
| splice_acceptor_variant&splice_donor_variant&intron_variant                  | 19             | Other_regulatory                |             |
| splice_region_variant&non_coding_exon_variant                                | 61             | Other_regulatory                |             |
| stop_retained_variant                                                        | 19             | Other_regulatory                |             |

|                                                                                 |               |                  |
|---------------------------------------------------------------------------------|---------------|------------------|
| frameshift_variant&splice_region_variant                                        | 13            | Other_regulatory |
| stop_gained                                                                     | 161           | Other_regulatory |
| splice_acceptor_variant&splice_region_variant&intron_variant                    | 11            | Other_regulatory |
| splice_region_variant&stop_retained_variant                                     | 3             | Other_regulatory |
| stop_lost&splice_region_variant                                                 | 9             | Other_regulatory |
| start_lost                                                                      | 27            | Other_regulatory |
| disruptive_inframe_insertion                                                    | 7             | Other_regulatory |
| inframe_insertion                                                               | 13            | Other_regulatory |
| frameshift_variant&stop_lost&splice_region_variant                              | 1             | Other_regulatory |
| stop_gained&splice_region_variant                                               | 9             | Other_regulatory |
| stop_lost                                                                       | 3             | Other_regulatory |
| frameshift_variant&splice_acceptor_variant&splice_region_variant&intron_variant | 2             | Other_regulatory |
| frameshift_variant&stop_gained                                                  | 1             | Other_regulatory |
| splice_donor_variant&splice_region_variant&intron_variant                       | 5             | Other_regulatory |
| stop_gained&inframe_insertion                                                   | 1             | Other_regulatory |
| initiator_codon_variant&non_canonical_start_codon                               | 1             | Other_regulatory |
| frameshift_variant&start_lost&splice_region_variant                             | 1             | Other_regulatory |
| frameshift_variant&stop_lost                                                    | 1             | Other_regulatory |
| frameshift_variant&start_lost                                                   | 1             | Other_regulatory |
| disruptive_inframe_deletion&splice_region_variant                               | 1             | Other_regulatory |
| <hr/> Total                                                                     | <hr/> 7853211 | <hr/> 100.00%    |

\* The proportion was calculated as numbers of SNPs in a class divided by total SNPs/Indel and then multiplied by 100.

**Table S3.** Functional annotation of all DNA variants (38,318,974) based on DNA variants of the 1000 bulls genome project.

| Functional class annotation                   | Number of SNPs | Classification of SNP functions | Proportion* |
|-----------------------------------------------|----------------|---------------------------------|-------------|
| intergenic_region                             | 25179655       | intergenic_region               | 65.70%      |
| downstream_gene_variant                       | 1393115        | downstream_gene_variant         | 3.60%       |
| upstream_gene_variant                         | 1591843        | upstream_gene_variant           | 4.20%       |
| non_coding_exon_variant                       | 10973          | synonymous_variant              | 0.43%       |
| synonymous_variant                            | 155200         | synonymous_variant              |             |
| intron_variant                                | 9693772        | intron_variant                  | 25.30%      |
| missense_variant                              | 143708         | missense_variant                | 0.40%       |
| 3'UTR_variant                                 | 88639          | 3'UTR_variant                   | 0.20%       |
| 5'UTR_variant                                 | 16109          | 5'UTR_variant                   | 0.05%       |
| 5'UTR_premature_start_codon_gain_variant      | 2698           | 5'UTR_variant                   |             |
| splice_region_variant&synonymous_variant      | 3439           | Other_regulatory                |             |
| stop_gained                                   | 3224           | Other_regulatory                |             |
| splice_region_variant&intron_variant          | 23960          | Other_regulatory                |             |
| splice_region_variant                         | 1039           | Other_regulatory                |             |
| splice_donor_variant&intron_variant           | 1614           | Other_regulatory                |             |
| splice_acceptor_variant&intron_variant        | 1430           | Other_regulatory                |             |
| missense_variant&splice_region_variant        | 3949           | Other_regulatory                | 0.12%       |
| inframe_deletion                              | 958            | Other_regulatory                |             |
| frameshift_variant                            | 1285           | Other_regulatory                |             |
| inframe_insertion                             | 134            | Other_regulatory                |             |
| splice_region_variant&non_coding_exon_variant | 426            | Other_regulatory                |             |
| disruptive_inframe_deletion                   | 529            | Other_regulatory                |             |
| frameshift_variant&stop_gained                | 19             | Other_regulatory                |             |

|                                                                                 |     |                  |
|---------------------------------------------------------------------------------|-----|------------------|
| frameshift_variant&splice_region_variant                                        | 133 | Other_regulatory |
| stop_gained&splice_region_variant                                               | 152 | Other_regulatory |
| start_lost                                                                      | 173 | Other_regulatory |
| splice_acceptor_variant&splice_donor_variant&intron_variant                     | 182 | Other_regulatory |
| disruptive_inframe_insertion                                                    | 76  | Other_regulatory |
| splice_donor_variant&splice_region_variant&intron_variant                       | 88  | Other_regulatory |
| splice_acceptor_variant&splice_region_variant&intron_variant                    | 115 | Other_regulatory |
| stop_retained_variant                                                           | 71  | Other_regulatory |
| disruptive_inframe_deletion&splice_region_variant                               | 11  | Other_regulatory |
| frameshift_variant&splice_acceptor_variant&splice_region_variant&intron_variant | 23  | Other_regulatory |
| stop_lost&splice_region_variant                                                 | 47  | Other_regulatory |
| frameshift_variant&splice_donor_variant&splice_region_variant&intron_variant    | 28  | Other_regulatory |
| stop_lost                                                                       | 76  | Other_regulatory |
| splice_region_variant&stop_retained_variant                                     | 34  | Other_regulatory |
| initiator_codon_variant                                                         | 21  | Other_regulatory |
| disruptive_inframe_insertion&splice_region_variant                              | 1   | Other_regulatory |
| frameshift_variant&stop_lost                                                    | 8   | Other_regulatory |
| frameshift_variant&stop_lost&splice_region_variant                              | 4   | Other_regulatory |
| frameshift_variant&start_lost                                                   | 7   | Other_regulatory |
| stop_gained&inframe_insertion                                                   | 5   | Other_regulatory |

|                                                     |          |                  |      |
|-----------------------------------------------------|----------|------------------|------|
| frameshift_variant&start_lost&splice_region_variant | 1        | Other_regulatory |      |
| Total SNP and Indel                                 | 38318974 |                  | 100% |

\* The proportion was calculated as numbers of SNPs in a class divided by total SNPs/Indel and then multiplied by 100

**Table S4.** Functional annotations of SNPs in the 50K SNP panel after quality control along with the number of variants in each class, classification of SNP functions, percentage of WGS and 9 functional class assignments

| Functional class annotation                       | Number of SNPs | Classification of SNP functions | Proportion* |
|---------------------------------------------------|----------------|---------------------------------|-------------|
| intergenic_region                                 | 18313          | intergenic_region               | 60.73%      |
| downstream_gene_variant                           | 1138           | downstream_gene_variant         | 3.77%       |
| upstream_gene_variant                             | 1308           | upstream_gene_variant           | 4.34%       |
| non_coding_transcript_exon_variant                | 15             | synonymous_variant              | 1.75%       |
| synonymous_variant                                | 513            | synonymous_variant              |             |
| intron_variant                                    | 8528           | intron_variant                  | 28.28%      |
| missense_variant                                  | 68             | missense_variant                | 0.23%       |
| 3'UTR_variant                                     | 193            | 3'UTR_variant                   | 0.64%       |
| 5'UTR_premature_start_codon_gain_variant          | 4              | 5'UTR_variant                   | 0.10%       |
| 5'UTR_variant                                     | 26             | 5'UTR_variant                   |             |
| initiator_codon_variant&non_canonical_start_codon | 1              | Other_regulatory                |             |
| missense_variant&splice_region_variant            | 3              | Other_regulatory                | 0.16%       |
| splice_region_variant                             | 1              | Other_regulatory                |             |
| splice_region_variant&intron_variant              | 27             | Other_regulatory                |             |

|                                                          |       |                  |
|----------------------------------------------------------|-------|------------------|
| splice_region_variant&non_coding_transcript_exon_variant | 2     | Other_regulatory |
| splice_region_variant&synonymous_variant                 | 13    | Other_regulatory |
| stop_retained_variant                                    | 2     | Other_regulatory |
| total                                                    | 30155 | 100.00%          |

\* The proportion was calculated as numbers of SNPs in a class divided by total SNPs/Indel and then multiplied by 100

**Table S5.** List of lead SNPs that were overlapped with QTLs published in Cattle QTL database within 1M bp up or 1M bp downstream for RFI, DMI, ADG, and MWT, where the last column shows a list of QTL ids with reference numbers in square brackets. Overlapped QTLs within 70k bp up or 70k bp downstream were highlighted in bold. References were listed at the end of the file.

| Trait | SNP            | Chr | bp        | No. of overlapped QTLs | Overlapped QTL ids [reference]         |
|-------|----------------|-----|-----------|------------------------|----------------------------------------|
| RFI   | rs109479784    | 1   | 121176492 | 1                      | 121956[7]                              |
| RFI   | rs110523019    | 3   | 6835555   | 1                      | 21045[27]                              |
| RFI   | rs382972340    | 12  | 54262083  | 1                      | 21067[27]                              |
| RFI   | Chr15:82875910 | 15  | 82875910  | 3                      | 131319[2], 131337[2], <b>56460[14]</b> |
| DMI   | rs384466084    | 6   | 31945021  | 1                      | 23691[22]                              |
| DMI   | rs463483203    | 6   | 32301275  | 1                      | 23691[22]                              |
| DMI   | rs384405067    | 6   | 39719047  | 1                      | 23734[22]                              |
| DMI   | rs383608859    | 6   | 39967379  | 1                      | 23734[22]                              |
| DMI   | rs110280465    | 6   | 40041892  | 1                      | 23734[22]                              |
| DMI   | rs136513257    | 6   | 40422038  | 1                      | 23734[22]                              |

|     |                |    |           |    |                                                                                                                                                                                                                                                                                                                                                                                                                                                                                                                                     |
|-----|----------------|----|-----------|----|-------------------------------------------------------------------------------------------------------------------------------------------------------------------------------------------------------------------------------------------------------------------------------------------------------------------------------------------------------------------------------------------------------------------------------------------------------------------------------------------------------------------------------------|
| DMI | rs110650030    | 6  | 41213430  | 1  | 23734[22]                                                                                                                                                                                                                                                                                                                                                                                                                                                                                                                           |
| DMI | rs210962809    | 6  | 41333075  | 1  | 23734[22]                                                                                                                                                                                                                                                                                                                                                                                                                                                                                                                           |
| DMI | rs110785425    | 10 | 70651353  | 1  | 23800[22]                                                                                                                                                                                                                                                                                                                                                                                                                                                                                                                           |
| ADG | rs382130743    | 2  | 36556122  | 1  | 23641[22]                                                                                                                                                                                                                                                                                                                                                                                                                                                                                                                           |
| ADG | Chr4:112725016 | 4  | 112725016 | 1  | 20670[28]                                                                                                                                                                                                                                                                                                                                                                                                                                                                                                                           |
| ADG | rs137822220    | 5  | 106247266 | 13 | <b>131017[2], 131018[2], 131034[2], 131035[2], 131036[2], 131038[2], 131039[2], 131040[2], 131042[2], 131043[2], 131044[2], 131045[2], 56473[14]</b>                                                                                                                                                                                                                                                                                                                                                                                |
| ADG | rs380377923    | 6  | 31546181  | 2  | 102120[8], <b>22808[23]</b>                                                                                                                                                                                                                                                                                                                                                                                                                                                                                                         |
| ADG | rs136764476    | 6  | 31656705  | 2  | 102120[8], 22808[23]                                                                                                                                                                                                                                                                                                                                                                                                                                                                                                                |
| ADG | rs110967603    | 6  | 35951727  | 5  | 102117[8], 102118[8], 102122[8], 102124[8], <b>25113[18]</b>                                                                                                                                                                                                                                                                                                                                                                                                                                                                        |
| ADG | rs378678939    | 6  | 36714098  | 1  | 25113[18]                                                                                                                                                                                                                                                                                                                                                                                                                                                                                                                           |
| ADG | rs385661392    | 6  | 37389583  | 1  | 102014[9]                                                                                                                                                                                                                                                                                                                                                                                                                                                                                                                           |
| ADG | rs133323815    | 6  | 37790429  | 33 | 124027[5], 124028[5], 124029[5], 124030[5], 124031[5], 124032[5], 124033[5], 124034[5], 124035[5], 124044[5], 124045[5], 124046[5], 124047[5], 124048[5], 124049[5], 124053[5], 124058[5], 124059[5], 124060[5], 124061[5], 124062[5], 124067[5], 124068[5], 124070[5], 124071[5], 124073[5], 124074[5], 124079[5], 102014[9], 20086[30], 20088[30], 20089[30], 20091[30]                                                                                                                                                           |
| ADG | Chr6:37862012  | 6  | 37862012  | 47 | 124027[5], 124028[5], 124029[5], 124030[5], 124031[5], 124032[5], 124033[5], 124034[5], 124035[5], 124036[5], 124037[5], 124038[5], 124039[5], 124043[5], 124044[5], 124045[5], 124046[5], 124047[5], 124048[5], 124049[5], 124050[5], 124051[5], 124052[5], 124053[5], 124057[5], 124058[5], 124059[5], 124060[5], 124061[5], 124062[5], 124063[5], 124064[5], 124065[5], 124067[5], 124068[5], 124070[5], 124071[5], 124073[5], 124074[5], 124079[5], 102014[9], 20086[30], 20088[30], 20089[30], 20091[30], 20094[30], 20095[30] |



|     |             |   |          |    |                                                                                                                                                                                                                                                                                                                                                                                                                                                                                                                                                                                                                                        |
|-----|-------------|---|----------|----|----------------------------------------------------------------------------------------------------------------------------------------------------------------------------------------------------------------------------------------------------------------------------------------------------------------------------------------------------------------------------------------------------------------------------------------------------------------------------------------------------------------------------------------------------------------------------------------------------------------------------------------|
| ADG | rs381043912 | 6 | 37957342 | 55 | 124027[5], 124028[5], 124029[5], 124030[5], 124031[5], 124032[5], 124033[5], 124034[5], 124035[5], 124036[5], 124037[5], 124038[5], 124039[5], 124040[5], 124041[5], 124042[5], 124043[5], 124044[5], 124045[5], 124046[5], 124047[5], 124048[5], 124049[5], 124050[5], 124051[5], 124052[5], 124053[5], 124054[5], 124055[5], 124057[5], 124058[5], 124059[5], 124060[5], 124061[5], 124062[5], 124063[5], 124064[5], 124065[5], 124067[5], 124068[5], 124069[5], 124070[5], 124071[5], 124073[5], 124074[5], 124079[5], 102014[9], 20086[30], 20088[30], 20089[30], 20091[30], 20094[30], 20095[30], 20097[30], 20099[30]            |
| ADG | rs383638885 | 6 | 38031945 | 56 | 124027[5], 124028[5], 124029[5], 124030[5], 124031[5], 124032[5], 124033[5], 124034[5], 124035[5], 124036[5], 124037[5], 124038[5], 124039[5], 124040[5], 124041[5], 124042[5], 124043[5], 124044[5], 124045[5], 124046[5], 124047[5], 124048[5], 124049[5], 124050[5], 124051[5], 124052[5], 124053[5], 124054[5], 124055[5], 124057[5], 124058[5], 124059[5], 124060[5], 124061[5], 124062[5], 124063[5], 124064[5], 124065[5], 124067[5], 124068[5], 124069[5], 124070[5], 124071[5], 124073[5], 124074[5], 124079[5], 102014[9], 20086[30], 20088[30], 20089[30], 20091[30], 20094[30], 20095[30], 20097[30], 20099[30], 20101[30] |
| ADG | rs210353492 | 6 | 38107063 | 56 | 124027[5], 124028[5], 124029[5], 124030[5], 124031[5], 124032[5], 124033[5], 124034[5], 124035[5], 124036[5], 124037[5], 124038[5], 124039[5], 124040[5], 124041[5], 124042[5], 124043[5], 124044[5], 124045[5], 124046[5], 124047[5], 124048[5], 124049[5], 124050[5], 124051[5], 124052[5], 124053[5], 124054[5], 124055[5], 124057[5], 124058[5], 124059[5], 124060[5], 124061[5], 124062[5], 124063[5], 124064[5], 124065[5], 124067[5], 124068[5], 124069[5], 124070[5], 124071[5], 124073[5], 124074[5], 124079[5], 102014[9], 20086[30], 20088[30], 20089[30], 20091[30], 20094[30], 20095[30], 20097[30], 20099[30], 20101[30] |
| ADG | rs207550149 | 6 | 38180681 | 56 | 124027[5], 124028[5], 124029[5], 124030[5], 124031[5], 124032[5], 124033[5], 124034[5], 124035[5], 124036[5], 124037[5], 124038[5], 124039[5], 124040[5], 124041[5], 124042[5], 124043[5], 124044[5], 124045[5], 124046[5], 124047[5], 124048[5], 124049[5], 124050[5], 124051[5], 124052[5], 124053[5], 124054[5], 124055[5], 124057[5], 124058[5], 124059[5], 124060[5], 124061[5], 124062[5], 124063[5], 124064[5], 124065[5], 124067[5], 124068[5], 124069[5], 124070[5], 124071[5], 124073[5], 124074[5], 124079[5], 102014[9], 20086[30], 20088[30], 20089[30], 20091[30], 20094[30], 20095[30], 20097[30], 20099[30], 20101[30] |

|     |               |   |          |    |                                                                                                                                                                                                                                                                                                                                                                                                                                                                                                                                                                                                                                                                |
|-----|---------------|---|----------|----|----------------------------------------------------------------------------------------------------------------------------------------------------------------------------------------------------------------------------------------------------------------------------------------------------------------------------------------------------------------------------------------------------------------------------------------------------------------------------------------------------------------------------------------------------------------------------------------------------------------------------------------------------------------|
| ADG | rs209915052   | 6 | 38259595 | 56 | 124027[5], 124028[5], 124029[5], 124030[5], 124031[5], 124032[5], 124033[5], 124034[5], 124035[5], 124036[5], 124037[5], 124038[5], 124039[5], 124040[5], 124041[5], 124042[5], 124043[5], 124044[5], 124045[5], 124046[5], 124047[5], 124048[5], 124049[5], 124050[5], 124051[5], 124052[5], 124053[5], 124054[5], 124055[5], 124057[5], 124058[5], 124059[5], 124060[5], 124061[5], 124062[5], 124063[5], 124064[5], 124065[5], 124067[5], 124068[5], 124069[5], 124070[5], 124071[5], 124073[5], 124074[5], 124079[5], 102014[9], 20086[30], 20088[30], 20089[30], 20091[30], 20094[30], 20095[30], 20097[30], 20099[30], 20101[30]                         |
| ADG | rs382462900   | 6 | 38429007 | 56 | 124027[5], 124028[5], 124029[5], 124030[5], 124031[5], 124032[5], 124033[5], 124034[5], 124035[5], 124036[5], 124037[5], 124038[5], 124039[5], 124040[5], 124041[5], 124042[5], 124043[5], 124044[5], 124045[5], 124046[5], 124047[5], 124048[5], 124049[5], 124050[5], 124051[5], 124052[5], 124053[5], 124054[5], 124055[5], 124057[5], 124058[5], 124059[5], 124060[5], 124061[5], 124062[5], 124063[5], 124064[5], 124065[5], 124067[5], 124068[5], 124069[5], 124070[5], 124071[5], 124073[5], <b>124074[5]</b> , 124079[5], 102014[9], 20086[30], 20088[30], 20089[30], 20091[30], 20094[30], 20095[30], 20097[30], 20099[30], 20101[30]                 |
| ADG | rs385289515   | 6 | 38509747 | 56 | 124027[5], 124028[5], 124029[5], 124030[5], 124031[5], 124032[5], 124033[5], 124034[5], 124035[5], 124036[5], 124037[5], 124038[5], 124039[5], 124040[5], 124041[5], 124042[5], 124043[5], 124044[5], 124045[5], 124046[5], 124047[5], <b>124048[5]</b> , 124049[5], 124050[5], 124051[5], 124052[5], 124053[5], 124054[5], 124055[5], 124057[5], 124058[5], 124059[5], 124060[5], 124061[5], 124062[5], 124063[5], 124064[5], 124065[5], 124067[5], 124068[5], 124069[5], 124070[5], 124071[5], 124073[5], <b>124074[5]</b> , 124079[5], 102014[9], 20086[30], 20088[30], 20089[30], 20091[30], 20094[30], 20095[30], 20097[30], 20099[30], 20101[30]         |
| ADG | Chr6:38606864 | 6 | 38606864 | 56 | 124027[5], 124028[5], 124029[5], 124030[5], 124031[5], 124032[5], 124033[5], 124034[5], 124035[5], 124036[5], 124037[5], 124038[5], 124039[5], 124040[5], 124041[5], 124042[5], 124043[5], 124044[5], 124045[5], 124046[5], 124047[5], <b>124048[5]</b> , 124049[5], 124050[5], 124051[5], 124052[5], 124053[5], 124054[5], 124055[5], 124057[5], 124058[5], 124059[5], 124060[5], 124061[5], 124062[5], 124063[5], 124064[5], 124065[5], 124067[5], 124068[5], 124069[5], <b>124070[5]</b> , 124071[5], 124073[5], 124074[5], <b>124079[5]</b> , 102014[9], 20086[30], 20088[30], 20089[30], 20091[30], 20094[30], 20095[30], 20097[30], 20099[30], 20101[30] |

|     |             |   |          |    |                                                                                                                                                                                                                                                                                                                                                                                                                                                                                                                                                                                                                                        |
|-----|-------------|---|----------|----|----------------------------------------------------------------------------------------------------------------------------------------------------------------------------------------------------------------------------------------------------------------------------------------------------------------------------------------------------------------------------------------------------------------------------------------------------------------------------------------------------------------------------------------------------------------------------------------------------------------------------------------|
| ADG | rs381763403 | 6 | 38681815 | 56 | 124027[5], 124028[5], 124029[5], 124030[5], 124031[5], 124032[5], 124033[5], 124034[5], 124035[5], 124036[5], 124037[5], 124038[5], 124039[5], 124040[5], 124041[5], 124042[5], 124043[5], 124044[5], 124045[5], 124046[5], 124047[5], 124048[5], 124049[5], 124050[5], 124051[5], 124052[5], 124053[5], 124054[5], 124055[5], 124057[5], 124058[5], 124059[5], 124060[5], 124061[5], 124062[5], 124063[5], 124064[5], 124065[5], 124067[5], 124068[5], 124069[5], 124070[5], 124071[5], 124073[5], 124074[5], 124079[5], 102014[9], 20086[30], 20088[30], 20089[30], 20091[30], 20094[30], 20095[30], 20097[30], 20099[30], 20101[30] |
| ADG | rs110302982 | 6 | 38760889 | 56 | 124027[5], 124028[5], 124029[5], 124030[5], 124031[5], 124032[5], 124033[5], 124034[5], 124035[5], 124036[5], 124037[5], 124038[5], 124039[5], 124040[5], 124041[5], 124042[5], 124043[5], 124044[5], 124045[5], 124046[5], 124047[5], 124048[5], 124049[5], 124050[5], 124051[5], 124052[5], 124053[5], 124054[5], 124055[5], 124057[5], 124058[5], 124059[5], 124060[5], 124061[5], 124062[5], 124063[5], 124064[5], 124065[5], 124067[5], 124068[5], 124069[5], 124070[5], 124071[5], 124073[5], 124074[5], 124079[5], 102014[9], 20086[30], 20088[30], 20089[30], 20091[30], 20094[30], 20095[30], 20097[30], 20099[30], 20101[30] |
| ADG | rs109696064 | 6 | 38837730 | 56 | 124027[5], 124028[5], 124029[5], 124030[5], 124031[5], 124032[5], 124033[5], 124034[5], 124035[5], 124036[5], 124037[5], 124038[5], 124039[5], 124040[5], 124041[5], 124042[5], 124043[5], 124044[5], 124045[5], 124046[5], 124047[5], 124048[5], 124049[5], 124050[5], 124051[5], 124052[5], 124053[5], 124054[5], 124055[5], 124057[5], 124058[5], 124059[5], 124060[5], 124061[5], 124062[5], 124063[5], 124064[5], 124065[5], 124067[5], 124068[5], 124069[5], 124070[5], 124071[5], 124073[5], 124074[5], 124079[5], 102014[9], 20086[30], 20088[30], 20089[30], 20091[30], 20094[30], 20095[30], 20097[30], 20099[30], 20101[30] |
| ADG | rs110995268 | 6 | 38914196 | 56 | 124027[5], 124028[5], 124029[5], 124030[5], 124031[5], 124032[5], 124033[5], 124034[5], 124035[5], 124036[5], 124037[5], 124038[5], 124039[5], 124040[5], 124041[5], 124042[5], 124043[5], 124044[5], 124045[5], 124046[5], 124047[5], 124048[5], 124049[5], 124050[5], 124051[5], 124052[5], 124053[5], 124054[5], 124055[5], 124057[5], 124058[5], 124059[5], 124060[5], 124061[5], 124062[5], 124063[5], 124064[5], 124065[5], 124067[5], 124068[5], 124069[5], 124070[5], 124071[5], 124073[5], 124074[5], 124079[5], 102014[9], 20086[30], 20088[30], 20089[30], 20091[30], 20094[30], 20095[30], 20097[30], 20099[30], 20101[30] |

|     |             |   |          |    |                                                                                                                                                                                                                                                                                                                                                                                                                                                                                                                                                                                                                                               |
|-----|-------------|---|----------|----|-----------------------------------------------------------------------------------------------------------------------------------------------------------------------------------------------------------------------------------------------------------------------------------------------------------------------------------------------------------------------------------------------------------------------------------------------------------------------------------------------------------------------------------------------------------------------------------------------------------------------------------------------|
| ADG | rs110001259 | 6 | 39026381 | 56 | 124027[5], 124028[5], 124029[5], 124030[5], 124031[5], 124032[5], 124033[5], 124034[5], 124035[5], 124036[5], 124037[5], 124038[5], 124039[5], 124040[5], 124041[5], 124042[5], 124043[5], 124044[5], 124045[5], 124046[5], 124047[5], 124048[5], 124049[5], 124050[5], 124051[5], 124052[5], 124053[5], 124054[5], 124055[5], 124057[5], 124058[5], 124059[5], 124060[5], 124061[5], 124062[5], 124063[5], 124064[5], 124065[5], 124067[5], 124068[5], 124069[5], 124070[5], 124071[5], 124073[5], 124074[5], 124079[5], 102014[9], 20086[30], 20088[30], 20089[30], 20091[30], 20094[30], 20095[30], 20097[30], 20099[30], <b>20101[30]</b> |
| ADG | rs110987922 | 6 | 39113335 | 56 | 124027[5], 124028[5], 124029[5], 124030[5], 124031[5], 124032[5], 124033[5], 124034[5], 124035[5], 124036[5], 124037[5], 124038[5], 124039[5], 124040[5], 124041[5], 124042[5], 124043[5], 124044[5], 124045[5], 124046[5], 124047[5], 124048[5], 124049[5], 124050[5], 124051[5], 124052[5], 124053[5], 124054[5], 124055[5], 124057[5], 124058[5], 124059[5], 124060[5], 124061[5], 124062[5], 124063[5], 124064[5], 124065[5], 124067[5], 124068[5], 124069[5], 124070[5], 124071[5], 124073[5], 124074[5], 124079[5], 102014[9], 20086[30], 20088[30], 20089[30], 20091[30], 20094[30], 20095[30], 20097[30], 20099[30], 20101[30]        |
| ADG | rs110218841 | 6 | 39214342 | 56 | 124027[5], 124028[5], 124029[5], 124030[5], 124031[5], 124032[5], 124033[5], 124034[5], 124035[5], 124036[5], 124037[5], 124038[5], 124039[5], 124040[5], 124041[5], 124042[5], 124043[5], 124044[5], 124045[5], 124046[5], 124047[5], 124048[5], 124049[5], 124050[5], 124051[5], 124052[5], 124053[5], 124054[5], 124055[5], 124057[5], 124058[5], 124059[5], 124060[5], 124061[5], 124062[5], 124063[5], 124064[5], 124065[5], 124067[5], 124068[5], 124069[5], 124070[5], 124071[5], 124073[5], 124074[5], 124079[5], 102014[9], 20086[30], 20088[30], 20089[30], 20091[30], 20094[30], 20095[30], 20097[30], 20099[30], 20101[30]        |
| ADG | rs110747048 | 6 | 39353897 | 55 | 124027[5], 124028[5], 124029[5], 124030[5], 124031[5], 124032[5], 124033[5], 124034[5], 124035[5], 124036[5], 124037[5], 124038[5], 124039[5], 124040[5], 124041[5], 124042[5], 124043[5], 124044[5], 124045[5], 124046[5], 124047[5], 124048[5], 124049[5], 124050[5], 124051[5], 124052[5], 124053[5], 124054[5], 124055[5], 124057[5], 124058[5], 124059[5], 124060[5], 124061[5], 124062[5], 124063[5], 124064[5], 124065[5], 124067[5], 124068[5], 124069[5], 124070[5], 124071[5], 124073[5], 124074[5], 124079[5], 20086[30], 20088[30], 20089[30], 20091[30], 20094[30], 20095[30], 20097[30], 20099[30], 20101[30]                   |

|     |             |   |          |    |                                                                                                                                                                                                                                                                                                                                                                                                                                                                                                                                                                                                                             |
|-----|-------------|---|----------|----|-----------------------------------------------------------------------------------------------------------------------------------------------------------------------------------------------------------------------------------------------------------------------------------------------------------------------------------------------------------------------------------------------------------------------------------------------------------------------------------------------------------------------------------------------------------------------------------------------------------------------------|
| ADG | rs109433941 | 6 | 39444050 | 55 | 124027[5], 124028[5], 124029[5], 124030[5], 124031[5], 124032[5], 124033[5], 124034[5], 124035[5], 124036[5], 124037[5], 124038[5], 124039[5], 124040[5], 124041[5], 124042[5], 124043[5], 124044[5], 124045[5], 124046[5], 124047[5], 124048[5], 124049[5], 124050[5], 124051[5], 124052[5], 124053[5], 124054[5], 124055[5], 124057[5], 124058[5], 124059[5], 124060[5], 124061[5], 124062[5], 124063[5], 124064[5], 124065[5], 124067[5], 124068[5], 124069[5], 124070[5], 124071[5], 124073[5], 124074[5], 124079[5], 20086[30], 20088[30], 20089[30], 20091[30], 20094[30], 20095[30], 20097[30], 20099[30], 20101[30] |
| ADG | rs133877406 | 6 | 39571260 | 54 | 124027[5], 124028[5], 124029[5], 124030[5], 124031[5], 124032[5], 124033[5], 124034[5], 124035[5], 124036[5], 124037[5], 124038[5], 124039[5], 124040[5], 124041[5], 124042[5], 124043[5], 124044[5], 124045[5], 124046[5], 124047[5], 124048[5], 124049[5], 124050[5], 124051[5], 124052[5], 124053[5], 124054[5], 124055[5], 124057[5], 124058[5], 124059[5], 124060[5], 124061[5], 124062[5], 124063[5], 124064[5], 124065[5], 124067[5], 124068[5], 124069[5], 124070[5], 124071[5], 124073[5], 124079[5], 20086[30], 20088[30], 20089[30], 20091[30], 20094[30], 20095[30], 20097[30], 20099[30], 20101[30]            |
| ADG | rs385370479 | 6 | 39642714 | 53 | 124027[5], 124028[5], 124029[5], 124030[5], 124031[5], 124032[5], 124033[5], 124034[5], 124035[5], 124036[5], 124037[5], 124038[5], 124039[5], 124040[5], 124041[5], 124042[5], 124043[5], 124044[5], 124045[5], 124046[5], 124047[5], 124049[5], 124050[5], 124051[5], 124052[5], 124053[5], 124054[5], 124055[5], 124057[5], 124058[5], 124059[5], 124060[5], 124061[5], 124062[5], 124063[5], 124064[5], 124065[5], 124067[5], 124068[5], 124069[5], 124070[5], 124071[5], 124073[5], 124079[5], 20086[30], 20088[30], 20089[30], 20091[30], 20094[30], 20095[30], 20097[30], 20099[30], 20101[30]                       |
| ADG | rs384405067 | 6 | 39719047 | 48 | 124027[5], 124028[5], 124029[5], 124030[5], 124031[5], 124032[5], 124033[5], 124034[5], 124036[5], 124037[5], 124038[5], 124039[5], 124040[5], 124041[5], 124042[5], 124043[5], 124044[5], 124045[5], 124046[5], 124049[5], 124050[5], 124051[5], 124052[5], 124053[5], 124054[5], 124055[5], 124057[5], 124058[5], 124059[5], 124060[5], 124061[5], 124062[5], 124063[5], 124064[5], 124065[5], 124067[5], 124068[5], 124069[5], 124073[5], 20086[30], 20088[30], 20089[30], 20091[30], 20094[30], 20095[30], 20097[30], 20099[30], 20101[30]                                                                              |
| ADG | rs382149180 | 6 | 39947443 | 3  | 102116[8], 102121[8], 20101[30]                                                                                                                                                                                                                                                                                                                                                                                                                                                                                                                                                                                             |
| ADG | rs110280465 | 6 | 40041892 | 2  | 102116[8], 102121[8]                                                                                                                                                                                                                                                                                                                                                                                                                                                                                                                                                                                                        |
| ADG | rs43458971  | 6 | 40302828 | 2  | 102116[8], 102121[8]                                                                                                                                                                                                                                                                                                                                                                                                                                                                                                                                                                                                        |

|     |               |   |          |    |                                                                                                                                                                                                                                                                                                                                                                                                                                                                                                                                                                                                                                                                                           |
|-----|---------------|---|----------|----|-------------------------------------------------------------------------------------------------------------------------------------------------------------------------------------------------------------------------------------------------------------------------------------------------------------------------------------------------------------------------------------------------------------------------------------------------------------------------------------------------------------------------------------------------------------------------------------------------------------------------------------------------------------------------------------------|
| ADG | rs109823986   | 6 | 40702520 | 2  | 102116[8], 102121[8]                                                                                                                                                                                                                                                                                                                                                                                                                                                                                                                                                                                                                                                                      |
| ADG | rs385648596   | 6 | 40900316 | 2  | 102116[8], <b>102121[8]</b>                                                                                                                                                                                                                                                                                                                                                                                                                                                                                                                                                                                                                                                               |
| ADG | rs134606084   | 6 | 40970705 | 2  | 102116[8], 102121[8]                                                                                                                                                                                                                                                                                                                                                                                                                                                                                                                                                                                                                                                                      |
| ADG | rs43464551    | 6 | 41047507 | 2  | 102116[8], 102121[8]                                                                                                                                                                                                                                                                                                                                                                                                                                                                                                                                                                                                                                                                      |
| ADG | rs135202983   | 6 | 41229657 | 3  | 102116[8], 102121[8], 124076[5]                                                                                                                                                                                                                                                                                                                                                                                                                                                                                                                                                                                                                                                           |
| ADG | rs43466307    | 6 | 42370579 | 2  | 124076[5], 22810[23]                                                                                                                                                                                                                                                                                                                                                                                                                                                                                                                                                                                                                                                                      |
| ADG | rs209393630   | 6 | 42510243 | 2  | 124076[5], 22810[23]                                                                                                                                                                                                                                                                                                                                                                                                                                                                                                                                                                                                                                                                      |
| ADG | rs381205796   | 6 | 42636544 | 2  | 124076[5], 22810[23]                                                                                                                                                                                                                                                                                                                                                                                                                                                                                                                                                                                                                                                                      |
| ADG | Chr6:43316828 | 6 | 43316828 | 1  | <b>22810[23]</b>                                                                                                                                                                                                                                                                                                                                                                                                                                                                                                                                                                                                                                                                          |
| ADG | Chr6:44029020 | 6 | 44029020 | 1  | 22810[23]                                                                                                                                                                                                                                                                                                                                                                                                                                                                                                                                                                                                                                                                                 |
| ADG | rs137370999   | 6 | 44133101 | 1  | 22810[23]                                                                                                                                                                                                                                                                                                                                                                                                                                                                                                                                                                                                                                                                                 |
| ADG | rs135988356   | 6 | 46224508 | 1  | 23755[22]                                                                                                                                                                                                                                                                                                                                                                                                                                                                                                                                                                                                                                                                                 |
| ADG | Chr6:46325186 | 6 | 46325186 | 1  | 23755[22]                                                                                                                                                                                                                                                                                                                                                                                                                                                                                                                                                                                                                                                                                 |
| ADG | rs110990855   | 6 | 46460427 | 1  | <b>23755[22]</b>                                                                                                                                                                                                                                                                                                                                                                                                                                                                                                                                                                                                                                                                          |
| ADG | rs381809466   | 6 | 46569119 | 1  | <b>23755[22]</b>                                                                                                                                                                                                                                                                                                                                                                                                                                                                                                                                                                                                                                                                          |
| ADG | rs134334613   | 6 | 46729101 | 1  | 23755[22]                                                                                                                                                                                                                                                                                                                                                                                                                                                                                                                                                                                                                                                                                 |
| ADG | rs379061965   | 6 | 46871416 | 1  | 23755[22]                                                                                                                                                                                                                                                                                                                                                                                                                                                                                                                                                                                                                                                                                 |
| ADG | rs134663272   | 6 | 47128886 | 1  | 23755[22]                                                                                                                                                                                                                                                                                                                                                                                                                                                                                                                                                                                                                                                                                 |
| ADG | rs110114429   | 7 | 93148272 | 55 | 131019[2], 131020[2], 131021[2], 131022[2], 131023[2], 131024[2], <b>131025[2], 131026[2], 131027[2], 131028[2]</b> ,<br>131029[2], <b>131037[2], 131041[2]</b> , 131046[2], 131047[2], 131048[2], 131049[2], <b>131050[2], 131051[2]</b> , 131052[2],<br>131055[2], <b>131056[2], 131057[2]</b> , 131058[2], 131059[2], 131060[2], 131063[2], 131064[2], 131072[2], 131073[2],<br>131074[2], 131075[2], 131076[2], 131077[2], 131078[2], 131079[2], 131080[2], 131081[2], 131082[2], 131083[2],<br>131095[2], 131096[2], 131097[2], 131099[2], 131100[2], 131101[2], 131110[2], 131112[2], 131119[2], 131120[2],<br>131123[2], 101982[9], <b>22785[23]</b> , 131098[2], <b>56474[14]</b> |

|     |                |    |           |    |                                                                                                                                                                                                                                                                                                                                                                                                                                                                                                                                                                                                                                    |
|-----|----------------|----|-----------|----|------------------------------------------------------------------------------------------------------------------------------------------------------------------------------------------------------------------------------------------------------------------------------------------------------------------------------------------------------------------------------------------------------------------------------------------------------------------------------------------------------------------------------------------------------------------------------------------------------------------------------------|
| ADG | rs109901274    | 7  | 93244933  | 55 | <b>131019[2], 131020[2], 131021[2], 131022[2], 131023[2], 131024[2], 131025[2], 131026[2], 131027[2], 131028[2], 131029[2], 131037[2], 131041[2], 131046[2], 131047[2], 131048[2], 131049[2], 131050[2], 131051[2], 131052[2], 131055[2], 131056[2], 131057[2], 131058[2], 131059[2], 131060[2], 131063[2], 131064[2], 131072[2], 131073[2], 131074[2], 131075[2], 131076[2], 131077[2], 131078[2], 131079[2], 131080[2], 131081[2], 131082[2], 131083[2], 131095[2], 131096[2], 131097[2], 131099[2], 131100[2], 131101[2], 131110[2], 131112[2], 131119[2], 131120[2], 131123[2], 101982[9], 22785[23], 131098[2], 56474[14]</b> |
| ADG | rs41681899     | 13 | 18998047  | 1  | 23831[22]                                                                                                                                                                                                                                                                                                                                                                                                                                                                                                                                                                                                                          |
| ADG | rs41693642     | 13 | 45111501  | 1  | 23220[19]                                                                                                                                                                                                                                                                                                                                                                                                                                                                                                                                                                                                                          |
| ADG | Chr13:45255892 | 13 | 45255892  | 1  | 23220[19]                                                                                                                                                                                                                                                                                                                                                                                                                                                                                                                                                                                                                          |
| ADG | rs42853892     | 13 | 45349576  | 1  | 23220[19]                                                                                                                                                                                                                                                                                                                                                                                                                                                                                                                                                                                                                          |
| ADG | rs208583895    | 14 | 24153141  | 2  | 102021[9], 20873[25]                                                                                                                                                                                                                                                                                                                                                                                                                                                                                                                                                                                                               |
| ADG | rs110220085    | 14 | 24235302  | 3  | 102021[9], 20873[25], 20848[26]                                                                                                                                                                                                                                                                                                                                                                                                                                                                                                                                                                                                    |
| ADG | rs211486269    | 14 | 24508890  | 8  | 102021[9], 20873[25], 20848[26], 20849[26], 20850[26], 20851[26], 20852[26], 20853[26]                                                                                                                                                                                                                                                                                                                                                                                                                                                                                                                                             |
| ADG | rs41724405     | 14 | 24626845  | 8  | 102021[9], 20873[25], 20848[26], 20849[26], 20850[26], 20851[26], 20852[26], 20853[26]                                                                                                                                                                                                                                                                                                                                                                                                                                                                                                                                             |
| ADG | rs110144371    | 14 | 24895889  | 8  | 102021[9], 20873[25], 20848[26], 20849[26], 20850[26], 20851[26], 20852[26], 20853[26]                                                                                                                                                                                                                                                                                                                                                                                                                                                                                                                                             |
| ADG | rs134215421    | 14 | 25006125  | 8  | <b>102021[9], 20873[25]</b> , 20848[26], 20849[26], 20850[26], 20851[26], 20852[26], 20853[26]                                                                                                                                                                                                                                                                                                                                                                                                                                                                                                                                     |
| ADG | rs109060535    | 14 | 26223578  | 6  | 20848[26], 20849[26], 20850[26], 20851[26], 20852[26], 20853[26]                                                                                                                                                                                                                                                                                                                                                                                                                                                                                                                                                                   |
| ADG | rs210931678    | 20 | 4277046   | 3  | 130810[2], 22839[23], 22840[23]                                                                                                                                                                                                                                                                                                                                                                                                                                                                                                                                                                                                    |
| ADG | rs41933279     | 20 | 4583717   | 2  | 22839[23], 22840[23]                                                                                                                                                                                                                                                                                                                                                                                                                                                                                                                                                                                                               |
| ADG | rs43349801     | 20 | 4662257   | 2  | 22839[23], 22840[23]                                                                                                                                                                                                                                                                                                                                                                                                                                                                                                                                                                                                               |
| ADG | rs43349740     | 20 | 4778613   | 2  | <b>22839[23]</b> , 22840[23]                                                                                                                                                                                                                                                                                                                                                                                                                                                                                                                                                                                                       |
| ADG | rs42661323     | 20 | 4916731   | 2  | <b>22839[23], 22840[23]</b>                                                                                                                                                                                                                                                                                                                                                                                                                                                                                                                                                                                                        |
| ADG | rs473496654    | 20 | 5006104   | 2  | <b>22839[23], 22840[23]</b>                                                                                                                                                                                                                                                                                                                                                                                                                                                                                                                                                                                                        |
| ADG | rs448890458    | 25 | 40587255  | 2  | 101999[9], 102041[9]                                                                                                                                                                                                                                                                                                                                                                                                                                                                                                                                                                                                               |
| MWT | rs110358394    | 5  | 106266665 | 1  | 140481[1]                                                                                                                                                                                                                                                                                                                                                                                                                                                                                                                                                                                                                          |

|     |               |   |          |   |                                                               |
|-----|---------------|---|----------|---|---------------------------------------------------------------|
| MWT | rs210609295   | 6 | 31853453 | 1 | 131411[2]                                                     |
| MWT | rs384466084   | 6 | 31945021 | 1 | <b>131411[2]</b>                                              |
| MWT | rs386082192   | 6 | 32467576 | 1 | 131411[2]                                                     |
| MWT | rs109672376   | 6 | 35634137 | 1 | 25112[18]                                                     |
| MWT | Chr6:35727960 | 6 | 35727960 | 1 | 25112[18]                                                     |
| MWT | rs463408175   | 6 | 35815378 | 1 | 25112[18]                                                     |
| MWT | rs109168002   | 6 | 35892044 | 1 | <b>25112[18]</b>                                              |
| MWT | rs135391932   | 6 | 35985958 | 1 | <b>25112[18]</b>                                              |
| MWT | Chr6:36063637 | 6 | 36063637 | 1 | 25112[18]                                                     |
| MWT | Chr6:36142577 | 6 | 36142577 | 1 | 25112[18]                                                     |
| MWT | rs207985227   | 6 | 36217568 | 1 | 25112[18]                                                     |
| MWT | Chr6:36358198 | 6 | 36358198 | 1 | 25112[18]                                                     |
| MWT | rs110173598   | 6 | 36430643 | 1 | 25112[18]                                                     |
| MWT | rs207995078   | 6 | 36597371 | 1 | 25112[18]                                                     |
| MWT | rs137290140   | 6 | 37007648 | 1 | 130915[2]                                                     |
| MWT | rs208802803   | 6 | 37312750 | 2 | 130915[2], 25114[18]                                          |
| MWT | rs385661392   | 6 | 37389583 | 2 | 130915[2], 25114[18]                                          |
| MWT | rs211048534   | 6 | 37461131 | 2 | 130915[2], 25114[18]                                          |
| MWT | rs109100620   | 6 | 37595062 | 3 | 131414[2], 130915[2], 25114[18]                               |
| MWT | Chr6:37666690 | 6 | 37666690 | 3 | 131414[2], 130915[2], 25114[18]                               |
| MWT | rs110111900   | 6 | 37791785 | 4 | 131414[2], <b>130915[2]</b> , 25114[18], 23717[22]            |
| MWT | rs383473904   | 6 | 37872592 | 4 | 131414[2], <b>130915[2]</b> , 25114[18], 23717[22]            |
| MWT | Chr6:37959886 | 6 | 37959886 | 5 | 131414[2], 130915[2], 25114[18], 23717[22], 23723[22]         |
| MWT | rs383638885   | 6 | 38031945 | 5 | 131414[2], 130915[2], <b>25114[18]</b> , 23717[22], 23723[22] |
| MWT | rs210353492   | 6 | 38107063 | 5 | 131414[2], 130915[2], <b>25114[18]</b> , 23717[22], 23723[22] |



|     |               |   |          |    |                                                                                                                                                                                                              |
|-----|---------------|---|----------|----|--------------------------------------------------------------------------------------------------------------------------------------------------------------------------------------------------------------|
| MWT | rs207550149   | 6 | 38180681 | 5  | 131414[2], 130915[2], 25114[18], 23717[22], 23723[22]                                                                                                                                                        |
| MWT | rs379490408   | 6 | 38253085 | 9  | 131388[2], 131389[2], 131393[2], 131394[2], 131414[2], 130915[2], 25114[18], 23717[22], 23723[22]                                                                                                            |
| MWT | rs382462900   | 6 | 38429007 | 18 | 131382[2], 131383[2], 131384[2], 131385[2], 131388[2], 131389[2], 131390[2], 131391[2], 131392[2], 131393[2], 131394[2], 131395[2], 131398[2], 131414[2], 130915[2], 25114[18], 23717[22], 23723[22]         |
| MWT | rs385289515   | 6 | 38509747 | 18 | 131382[2], 131383[2], 131384[2], 131385[2], 131388[2], 131389[2], 131390[2], 131391[2], 131392[2], 131393[2], 131394[2], 131395[2], 131398[2], <b>131414[2]</b> , 130915[2], 25114[18], 23717[22], 23723[22] |
| MWT | rs134828344   | 6 | 38587035 | 18 | 131382[2], 131383[2], 131384[2], 131385[2], 131388[2], 131389[2], 131390[2], 131391[2], 131392[2], 131393[2], 131394[2], 131395[2], 131398[2], <b>131414[2]</b> , 130915[2], 25114[18], 23717[22], 23723[22] |
| MWT | rs109355965   | 6 | 38657124 | 18 | 131382[2], 131383[2], 131384[2], 131385[2], 131388[2], 131389[2], 131390[2], 131391[2], 131392[2], 131393[2], 131394[2], 131395[2], 131398[2], 131414[2], 130915[2], 25114[18], <b>23717[22]</b> , 23723[22] |
| MWT | rs109843602   | 6 | 38750035 | 18 | 131382[2], 131383[2], 131384[2], 131385[2], 131388[2], 131389[2], 131390[2], 131391[2], 131392[2], 131393[2], 131394[2], 131395[2], 131398[2], 131414[2], 130915[2], 25114[18], <b>23717[22]</b> , 23723[22] |
| MWT | rs109732906   | 6 | 38872172 | 17 | 131382[2], 131383[2], 131384[2], 131385[2], 131388[2], 131389[2], 131390[2], 131391[2], 131392[2], 131393[2], 131394[2], 131395[2], 131398[2], 131414[2], 25114[18], 23717[22], <b>23723[22]</b>             |
| MWT | rs110369727   | 6 | 38947564 | 17 | 131382[2], 131383[2], 131384[2], 131385[2], 131388[2], 131389[2], 131390[2], 131391[2], 131392[2], 131393[2], 131394[2], 131395[2], 131398[2], 131414[2], 25114[18], 23717[22], <b>23723[22]</b>             |
| MWT | rs378858709   | 6 | 39020582 | 17 | 131382[2], 131383[2], 131384[2], 131385[2], 131388[2], 131389[2], 131390[2], 131391[2], 131392[2], 131393[2], 131394[2], 131395[2], 131398[2], 131414[2], 25114[18], 23717[22], 23723[22]                    |
| MWT | Chr6:39111019 | 6 | 39111019 | 16 | 131382[2], 131383[2], 131384[2], 131385[2], 131388[2], 131389[2], 131390[2], 131391[2], 131392[2], 131393[2], 131394[2], 131395[2], 131398[2], 131414[2], 23717[22], 23723[22]                               |
| MWT | rs109658371   | 6 | 39213566 | 16 | <b>131382[2], 131383[2], 131384[2], 131385[2], 131388[2], 131389[2], 131390[2], 131391[2], 131392[2], 131393[2], 131394[2], 131395[2], 131398[2]</b> , 131414[2], 23717[22], 23723[22]                       |

|     |               |   |          |    |                                                                                                                                                                                |
|-----|---------------|---|----------|----|--------------------------------------------------------------------------------------------------------------------------------------------------------------------------------|
| MWT | rs109840670   | 6 | 39364500 | 16 | 131382[2], 131383[2], 131384[2], 131385[2], 131388[2], 131389[2], 131390[2], 131391[2], 131392[2], 131393[2], 131394[2], 131395[2], 131398[2], 131414[2], 23717[22], 23723[22] |
| MWT | rs109433941   | 6 | 39444050 | 16 | 131382[2], 131383[2], 131384[2], 131385[2], 131388[2], 131389[2], 131390[2], 131391[2], 131392[2], 131393[2], 131394[2], 131395[2], 131398[2], 131414[2], 23717[22], 23723[22] |
| MWT | rs133877406   | 6 | 39571260 | 16 | 131382[2], 131383[2], 131384[2], 131385[2], 131388[2], 131389[2], 131390[2], 131391[2], 131392[2], 131393[2], 131394[2], 131395[2], 131398[2], 131414[2], 23717[22], 23723[22] |
| MWT | rs385370479   | 6 | 39642714 | 16 | 131382[2], 131383[2], 131384[2], 131385[2], 131388[2], 131389[2], 131390[2], 131391[2], 131392[2], 131393[2], 131394[2], 131395[2], 131398[2], 23717[22], 23723[22], 23733[22] |
| MWT | rs384405067   | 6 | 39719047 | 15 | 131382[2], 131383[2], 131384[2], 131385[2], 131388[2], 131389[2], 131390[2], 131391[2], 131392[2], 131393[2], 131394[2], 131395[2], 131398[2], 23723[22], 23733[22]            |
| MWT | rs381670901   | 6 | 39868660 | 15 | 131382[2], 131383[2], 131384[2], 131385[2], 131388[2], 131389[2], 131390[2], 131391[2], 131392[2], 131393[2], 131394[2], 131395[2], 131398[2], 23723[22], 23733[22]            |
| MWT | rs382149180   | 6 | 39947443 | 14 | 131382[2], 131383[2], 131384[2], 131385[2], 131388[2], 131389[2], 131390[2], 131391[2], 131392[2], 131393[2], 131394[2], 131395[2], 131398[2], 23733[22]                       |
| MWT | rs378255303   | 6 | 40029961 | 14 | 131382[2], 131383[2], 131384[2], 131385[2], 131388[2], 131389[2], 131390[2], 131391[2], 131392[2], 131393[2], 131394[2], 131395[2], 131398[2], 23733[22]                       |
| MWT | rs43456300    | 6 | 40141451 | 14 | 131382[2], 131383[2], 131384[2], 131385[2], 131388[2], 131389[2], 131390[2], 131391[2], 131392[2], 131393[2], 131394[2], 131395[2], 131398[2], 23733[22]                       |
| MWT | rs111031148   | 6 | 40245181 | 14 | 131382[2], 131383[2], 131384[2], 131385[2], 131388[2], 131389[2], 131390[2], 131391[2], 131392[2], 131394[2], 131395[2], 131398[2], 23733[22], 23738[22]                       |
| MWT | rs43070338    | 6 | 40421678 | 2  | 23733[22], 23738[22]                                                                                                                                                           |
| MWT | rs385648596   | 6 | 40900316 | 2  | 23733[22], 23738[22]                                                                                                                                                           |
| MWT | rs43461215    | 6 | 41190295 | 2  | 23733[22], <b>23738[22]</b>                                                                                                                                                    |
| MWT | rs385048356   | 6 | 41705949 | 1  | 23738[22]                                                                                                                                                                      |
| MWT | Chr6:41779679 | 6 | 41779679 | 1  | 23738[22]                                                                                                                                                                      |
| MWT | rs381611273   | 6 | 49301672 | 1  | 131345[2]                                                                                                                                                                      |

|     |               |    |          |    |                                                                                                                                                                                                                                         |
|-----|---------------|----|----------|----|-----------------------------------------------------------------------------------------------------------------------------------------------------------------------------------------------------------------------------------------|
| MWT | rs385825767   | 6  | 49388298 | 1  | 131345[2]                                                                                                                                                                                                                               |
| MWT | rs211227700   | 20 | 4110200  | 14 | 131135[2], 131137[2], 131138[2], 131146[2], 131173[2], 131174[2], 131190[2], 131191[2], 131410[2], 131412[2], 131415[2], 131416[2], 131417[2], 131418[2]                                                                                |
| MWT | Chr20:4205219 | 20 | 4205219  | 14 | 131135[2], 131137[2], 131138[2], 131146[2], 131173[2], 131174[2], 131190[2], 131191[2], 131410[2], 131412[2], 131415[2], 131416[2], 131417[2], 131418[2]                                                                                |
| MWT | rs210931678   | 20 | 4277046  | 14 | 131135[2], 131137[2], 131138[2], 131146[2], 131173[2], 131174[2], 131190[2], 131191[2], 131410[2], 131412[2], 131415[2], 131416[2], 131417[2], 131418[2]                                                                                |
| MWT | rs41934045    | 20 | 4563925  | 14 | 131135[2], <b>131137[2]</b> , <b>131138[2]</b> , 131146[2], <b>131173[2]</b> , <b>131174[2]</b> , 131190[2], 131191[2], 131410[2], 131412[2], 131415[2], 131416[2], 131417[2], 131418[2]                                                |
| MWT | rs43349810    | 20 | 4637730  | 14 | 131135[2], <b>131137[2]</b> , <b>131138[2]</b> , 131146[2], <b>131173[2]</b> , <b>131174[2]</b> , 131190[2], 131191[2], 131410[2], 131412[2], 131415[2], 131416[2], 131417[2], 131418[2]                                                |
| MWT | rs43349740    | 20 | 4778613  | 14 | 131135[2], 131137[2], 131138[2], 131146[2], 131173[2], 131174[2], 131190[2], 131191[2], 131410[2], 131412[2], 131415[2], 131416[2], 131417[2], 131418[2]                                                                                |
| MWT | rs41574252    | 20 | 4863507  | 14 | <b>131135[2]</b> , 131137[2], 131138[2], <b>131146[2]</b> , 131173[2], 131174[2], <b>131190[2]</b> , <b>131191[2]</b> , <b>131410[2]</b> , <b>131412[2]</b> , <b>131415[2]</b> , <b>131416[2]</b> , <b>131417[2]</b> , <b>131418[2]</b> |
| MWT | rs41574253    | 20 | 4964834  | 14 | <b>131135[2]</b> , 131137[2], 131138[2], 131146[2], 131173[2], 131174[2], <b>131190[2]</b> , <b>131191[2]</b> , 131410[2], 131412[2], 131415[2], 131416[2], <b>131417[2]</b> , 131418[2]                                                |
| MWT | rs211028837   | 20 | 5043189  | 14 | 131135[2], 131137[2], 131138[2], 131146[2], 131173[2], 131174[2], 131190[2], 131191[2], 131410[2], 131412[2], 131415[2], 131416[2], 131417[2], 131418[2]                                                                                |
| MWT | rs483267895   | 20 | 5375886  | 14 | 131135[2], 131137[2], 131138[2], 131146[2], 131173[2], 131174[2], 131190[2], 131191[2], 131410[2], 131412[2], 131415[2], 131416[2], 131417[2], 131418[2]                                                                                |
| MWT | rs207865196   | 20 | 5482087  | 15 | 130854[2], 131135[2], 131137[2], 131138[2], 131146[2], 131173[2], 131174[2], 131190[2], 131191[2], 131410[2], 131412[2], 131415[2], 131416[2], 131417[2], 131418[2]                                                                     |
| MWT | rs42517118    | 20 | 5983010  | 1  | 130854[2]                                                                                                                                                                                                                               |

List of references for QTLs in the Cattle QTL Database for feed efficiency related traits

| Reference Number | Title                                                                                         | Description                                                                                                                                                                                                                                                                | Details                                                                                    | ShortDetails       | Identifiers   |
|------------------|-----------------------------------------------------------------------------------------------|----------------------------------------------------------------------------------------------------------------------------------------------------------------------------------------------------------------------------------------------------------------------------|--------------------------------------------------------------------------------------------|--------------------|---------------|
| 1                | The genetic and biological basis of feed efficiency in mid-lactation Holstein dairy cows.     | Hardie LC, VandeHaar MJ, Tempelman RJ, Weigel KA, Armentano LE, Wiggans GR, Veerkamp RF, de Haas Y, Coffey MP, Connor EE, Hanigan MD, Staples C, Wang Z, Dekkers JCM, Spurlock DM.                                                                                         | J Dairy Sci. 2017 Nov;100(11):9061-9075. doi: 10.3168/jds.2017-12604. Epub 2017 Aug 23.    | J Dairy Sci. 2017  | PMID:28843688 |
| 2                | Genome-wide association study for feed efficiency and growth traits in U.S. beef cattle.      | Seabury CM, Oldeschulte DL, Saatchi M, Beever JE, Decker JE, Halley YA, Bhattarai EK, Molaei M, Freetly HC, Hansen SL, Yampara-Iquise H, Johnson KA, Kerley MS, Kim J, Loy DD, Marques E, Neiberghs HL, Schnabel RD, Shike DW, Spangler ML, Weaber RL, Garrick DJ, et al.  | BMC Genomics. 2017 May 18;18(1):386. doi: 10.1186/s12864-017-3754-y.                       | BMC Genomics. 2017 | PMID:28521758 |
| 3                | Genome-Wide Association Study for Carcass Traits in an Experimental Nelore Cattle Population. | Medeiros de Oliveira Silva R, Bonvino Stafuzza N, de Oliveira Fragomeni B, Miguel Ferreira de Camargo G, Matos Ceacero T, Noely Dos Santos Gonalves Cyrillo J, Baldi F, Augusti Boligon A, Zerlotti Mercadante ME, Lino Lourenco D, Misztal I, Galvo de Albuquerque L. | PLoS One. 2017 Jan 24;12(1):e0169860. doi: 10.1371/journal.pone.0169860. eCollection 2017. | PLoS One. 2017     | PMID:28118362 |
| 4                | Genome scan for postmortem carcass traits in Nelore cattle.                                   | Jnior GA, Costa RB, de Camargo GM, Carvalheiro R, Rosa GJ, Baldi F, Garcia DA, Gordo DG, Espigolan R, Takada L, Magalhes AF, Bresolin T, Feitosa FL, Chardulo LA, de Oliveira HN, de Albuquerque LG.                                                                   | J Anim Sci. 2016 Oct;94(10):4087-4095. doi: 10.2527/jas.2016-0632.                         | J Anim Sci. 2016   | PMID:27898882 |

|   |                                                                                                                                                                             |                                                                                                      |                                                                                                                                              |                          |               |
|---|-----------------------------------------------------------------------------------------------------------------------------------------------------------------------------|------------------------------------------------------------------------------------------------------|----------------------------------------------------------------------------------------------------------------------------------------------|--------------------------|---------------|
| 5 | Multi-strategy genome-wide association studies identify the DCAF16-NCAPG region as a susceptibility locus for average daily gain in cattle.                                 | Zhang W, Li J, Guo Y, Zhang L, Xu L, Gao X, Zhu B, Gao H, Ni H, Chen Y.                              | Sci Rep. 2016 Nov 28;6:38073. doi: 10.1038/srep38073.                                                                                        | Sci Rep. 2016            | PMID:27892541 |
| 6 | Genetic association of PLAG1, SCD, CYP7B1 and FASN SNPs and their effects on carcass weight, intramuscular fat and fatty acid composition in Hanwoo steers (Korean cattle). | Kim HJ, Sharma A, Lee SH, Lee DH, Lim DJ, Cho YM, Yang BS, Lee SH.                                   | Anim Genet. 2017 Apr;48(2):251-252. doi: 10.1111/age.12523. Epub 2016 Nov 22. No abstract available.                                         | Anim Genet. 2017         | PMID:27878829 |
| 7 | Genomic Regions Associated with Feed Efficiency Indicator Traits in an Experimental Nellore Cattle Population.                                                              | Olivieri BF, Mercadante ME, Cyrillo JN, Branco RH, Bonilha SF, de Albuquerque LG, Silva RM, Baldi F. | PLoS One. 2016 Oct 19;11(10):e0164390. doi: 10.1371/journal.pone.0164390. eCollection 2016. Erratum in: PLoS One. 2017 Feb 6;12(2):e0171845. | PLoS One. 2016           | PMID:27760167 |
| 8 | Genome wide association study on beef production traits in Marchigiana cattle breed.                                                                                        | Sorbolini S, Bongiorno S, Cellesi M, Gaspa G, Dimauro C, Valentini A, Macciotta NP.                  | J Anim Breed Genet. 2017 Feb;134(1):43-48. doi: 10.1111/jbg.12227. Epub 2016 Jun 22.                                                         | J Anim Breed Genet. 2017 | PMID:27329851 |
| 9 | Genome-wide association studies of growth traits in three dairy cattle breeds using whole-genome sequence data.                                                             | Mao X, Sahana G, De Koning DJ, Guldbandsen B.                                                        | J Anim Sci. 2016 Apr;94(4):1426-37. doi: 10.2527/jas.2015-9838.                                                                              | J Anim Sci. 2016         | PMID:27136002 |

|    |                                                                                                                                                                                  |                                                                                                                                                                                                                                                                        |                                                                                      |                                  |               |
|----|----------------------------------------------------------------------------------------------------------------------------------------------------------------------------------|------------------------------------------------------------------------------------------------------------------------------------------------------------------------------------------------------------------------------------------------------------------------|--------------------------------------------------------------------------------------|----------------------------------|---------------|
| 10 | Genome-wide association study for carcass traits, fatty acid composition, chemical composition, sugar, and the effects of related candidate genes in Japanese Black cattle.      | Sasago N, Abe T, Sakuma H, Kojima T, Uemoto Y.                                                                                                                                                                                                                         | Anim Sci J. 2017 Jan;88(1):33-44. doi: 10.1111/asj.12595. Epub 2016 Apr 25.          | Anim Sci J. 2017                 | PMID:27112906 |
| 11 | Multiple Linkage Disequilibrium Mapping Methods to Validate Additive Quantitative Trait Loci in Korean Native Cattle (Hanwoo).                                                   | Li Y, Kim JJ.                                                                                                                                                                                                                                                          | Asian-Australas J Anim Sci. 2015 Jul;28(7):926-35. doi: 10.5713/ajas.15.0077.        | Asian-Australas J Anim Sci. 2015 | PMID:26104396 |
| 12 | A genomewide association mapping study using ultrasound-scanned information identifies potential genomic regions and candidate genes affecting carcass traits in Nellore cattle. | Santana MH, Ventura RV, Utsunomiya YT, Neves HH, Alexandre PA, Oliveira Junior GA, Gomes RC, Bonin MN, Coutinho LL, Garcia JF, Silva SL, Fukumasu H, Leme PR, Ferraz JB.                                                                                               | J Anim Breed Genet. 2015 Dec;132(6):420-7. doi: 10.1111/jbg.12167. Epub 2015 May 27. | J Anim Breed Genet. 2015         | PMID:26016521 |
| 13 | Additive and epistatic genome-wide association for growth and ultrasound scan measures of carcass-related traits in Brahman cattle.                                              | Ali AA, Khatkar MS, Kadarmideen HN, Thomson PC.                                                                                                                                                                                                                        | J Anim Breed Genet. 2015 Apr;132(2):187-97. doi: 10.1111/jbg.12147. Epub 2015 Mar 6. | J Anim Breed Genet. 2015         | PMID:25754883 |
| 14 | QTLs associated with dry matter intake, metabolic mid-test weight, growth and feed efficiency have little overlap across 4 beef cattle studies.                                  | Saatchi M, Beever JE, Decker JE, Faulkner DB, Freetly HC, Hansen SL, Yampara-Iquise H, Johnson KA, Kachman SD, Kerley MS, Kim J, Loy DD, Marques E, Neibergs HL, Pollak EJ, Schnabel RD, Seabury CM, Shike DW, Snelling WM, Spangler ML, Weaber RL, Garrick DJ, et al. | BMC Genomics. 2014 Nov 20;15:1004. doi: 10.1186/1471-2164-15-1004.                   | BMC Genomics. 2014               | PMID:25410110 |

|    |                                                                                                                                                                   |                                                                                                                                   |                                                                                          |                    |               |
|----|-------------------------------------------------------------------------------------------------------------------------------------------------------------------|-----------------------------------------------------------------------------------------------------------------------------------|------------------------------------------------------------------------------------------|--------------------|---------------|
| 15 | Whole genome association study identifies regions of the bovine genome and biological pathways involved in carcass trait performance in Holstein-Friesian cattle. | Doran AG, Berry DP, Creevey CJ.                                                                                                   | BMC Genomics. 2014 Oct 1;15:837. doi: 10.1186/1471-2164-15-837.                          | BMC Genomics. 2014 | PMID:25273628 |
| 16 | Validation of genetic polymorphisms on BTA14 associated with carcass trait in a commercial Hanwoo population.                                                     | Sharma A, Dang CG, Kim KS, Kim JJ, Lee HK, Kim HC, Yeon SH, Kang HS, Lee SH.                                                      | Anim Genet. 2014 Dec;45(6):863-7. doi: 10.1111/age.12204. Epub 2014 Aug 28.              | Anim Genet. 2014   | PMID:25164077 |
| 17 | Large-effect pleiotropic or closely linked QTL segregate within and across ten US cattle breeds.                                                                  | Saatchi M, Schnabel RD, Taylor JF, Garrick DJ.                                                                                    | BMC Genomics. 2014 Jun 6;15:442. doi: 10.1186/1471-2164-15-442.                          | BMC Genomics. 2014 | PMID:24906442 |
| 18 | Single nucleotide polymorphisms for feed efficiency and performance in crossbred beef cattle.                                                                     | Abo-Ismael MK, Vander Voort G, Squires JJ, Swanson KC, Mandell IB, Liao X, Stothard P, Moore S, Plastow G, Miller SP.             | BMC Genet. 2014 Jan 30;15:14. doi: 10.1186/1471-2156-15-14.                              | BMC Genet. 2014    | PMID:24476087 |
| 19 | Bivariate genome-wide association analysis of the growth and intake components of feed efficiency.                                                                | Serão NV, González-Peña D, Beever JE, Bollero GA, Southey BR, Faulkner DB, Rodríguez-Zas SL.                                      | PLoS One. 2013 Oct 29;8(10):e78530. doi: 10.1371/journal.pone.0078530. eCollection 2013. | PLoS One. 2013     | PMID:24205251 |
| 20 | Genome-wide association study identifies major loci for carcass weight on BTA14 in Hanwoo (Korean cattle).                                                        | Lee SH, Choi BH, Lim D, Gondro C, Cho YM, Dang CG, Sharma A, Jang GW, Lee KT, Yoon D, Lee HK, Yeon SH, Yang BS, Kang HS, Hong SK. | PLoS One. 2013 Oct 7;8(10):e74677. doi: 10.1371/journal.pone.0074677. eCollection 2013.  | PLoS One. 2013     | PMID:24116007 |
| 21 | Genome-wide association analyses for carcass quality in crossbred beef cattle.                                                                                    | Lu D, Sargolzaei M, Kelly M, Vander Voort G, Wang Z, Mandell I, Moore S, Plastow G, Miller SP.                                    | BMC Genet. 2013 Sep 11;14:80. doi: 10.1186/1471-2156-14-80.                              | BMC Genet. 2013    | PMID:24024930 |

|    |                                                                                                                                                  |                                                                                                                                        |                                                                                                                |                  |               |
|----|--------------------------------------------------------------------------------------------------------------------------------------------------|----------------------------------------------------------------------------------------------------------------------------------------|----------------------------------------------------------------------------------------------------------------|------------------|---------------|
| 22 | Genome-wide association analyses for growth and feed efficiency traits in beef cattle.                                                           | Lu D, Miller S, Sargolzaei M, Kelly M, Vander Voort G, Caldwell T, Wang Z, Plastow G, Moore S.                                         | J Anim Sci. 2013 Aug;91(8):3612-33. doi: 10.2527/jas.2012-5716. Epub 2013 Jul 12.                              | J Anim Sci. 2013 | PMID:23851991 |
| 23 | Bayesian genome-wide association analysis of growth and yearling ultrasound measures of carcass traits in Brangus heifers.                       | Peters SO, Kizilkaya K, Garrick DJ, Fernando RL, Reecy JM, Weaber RL, Silver GA, Thomas MG.                                            | J Anim Sci. 2012 Oct;90(10):3398-409. doi: 10.2527/jas.2012-4507. Erratum in: J Anim Sci. 2013 Mar;91(3):1522. | J Anim Sci. 2012 | PMID:23038745 |
| 24 | Genome-wide association study identified three major QTL for carcass weight including the PLAG1-CHCHD7 QTN for stature in Japanese Black cattle. | Nishimura S, Watanabe T, Mizoshita K, Tatsuda K, Fujita T, Watanabe N, Sugimoto Y, Takasuga A.                                         | BMC Genet. 2012 May 20;13:40. doi: 10.1186/1471-2156-13-40.                                                    | BMC Genet. 2012  | PMID:22607022 |
| 25 | Genetic variation in PLAG1 associates with early life body weight and peripubertal weight and growth in Bos taurus.                              | Littlejohn M, Grala T, Sanders K, Walker C, Waghorn G, Macdonald K, Coppieters W, Georges M, Spelman R, Hillerton E, Davis S, Snell R. | Anim Genet. 2012 Oct;43(5):591-4. doi: 10.1111/j.1365-2052.2011.02293.x. Epub 2011 Dec 7.                      | Anim Genet. 2012 | PMID:22497486 |
| 26 | Genetic markers on BTA14 predictive for residual feed intake in beef steers and their effects on carcass and meat quality traits.                | Lindholm-Perry AK, Kuehn LA, Snelling WM, Smith TP, Ferrell CL, Jenkins TG, King DA, Shackelford SD, Wheeler TL, Freetly HC.           | Anim Genet. 2012 Oct;43(5):599-603. doi: 10.1111/j.1365-2052.2011.02307.x. Epub 2012 Feb 9.                    | Anim Genet. 2012 | PMID:22497335 |
| 27 | Genome-wide association analysis for feed efficiency in Angus cattle.                                                                            | Rolf MM, Taylor JF, Schnabel RD, McKay SD, McClure MC, Northcutt SL, Kerley MS, Weaber RL.                                             | Anim Genet. 2012 Aug;43(4):367-74. doi: 10.1111/j.1365-2052.2011.02273.x. Epub 2011 Oct 24.                    | Anim Genet. 2012 | PMID:22497295 |



|    |                                                                                                                                                                     |                                                                                                                                         |                                                                                                     |                          |               |
|----|---------------------------------------------------------------------------------------------------------------------------------------------------------------------|-----------------------------------------------------------------------------------------------------------------------------------------|-----------------------------------------------------------------------------------------------------|--------------------------|---------------|
| 28 | Evaluation of Bovine chemerin (RARRES2) Gene Variation on Beef Cattle Production Traits.                                                                            | Lindholm-Perry AK, Kuehn LA, Rempel LA, Smith TP, Cushman RA, McDanel TG, Wheeler TL, Shackelford SD, King DA, Freetly HC.              | Front Genet. 2012 Mar 29;3:39. doi: 10.3389/fgene.2012.00039. eCollection 2012.                     | Front Genet. 2012        | PMID:22479267 |
| 29 | Whole-genome QTL scan for ultrasound and carcass merit traits in beef cattle using Bayesian shrinkage method.                                                       | Nalaïla SM, Stothard P, Moore SS, Li C, Wang Z.                                                                                         | J Anim Breed Genet. 2012 Apr;129(2):107-19. doi: 10.1111/j.1439-0388.2011.00954.x. Epub 2011 Sep 8. | J Anim Breed Genet. 2012 | PMID:22394233 |
| 30 | Association, effects and validation of polymorphisms within the NCAPG - LCORL locus located on BTA6 with feed intake, gain, meat and carcass traits in beef cattle. | Lindholm-Perry AK, Sexten AK, Kuehn LA, Smith TP, King DA, Shackelford SD, Wheeler TL, Ferrell CL, Jenkins TG, Snelling WM, Freetly HC. | BMC Genet. 2011 Dec 14;12:103. doi: 10.1186/1471-2156-12-103.                                       | BMC Genet. 2011          | PMID:22168586 |
